# Supplementary material for: Assembly of the durian chloroplast genome using long PacBio reads
Source: PubMed Central journal article supplement (PMC7541610; doi:10.1038/s41598-020-73549-4), 2020-10-07

# Assembly of the durian chloroplast genome using long PacBio reads

Jeremy R. Shearman<sup>1</sup>, Chutima Sonthirod<sup>1</sup>, Chaiwat Naktang<sup>1</sup>, Duangjai Sangsrakru<sup>1</sup>, Thippawan Yoocha<sup>1</sup>, Ratchanee Chatbanyong<sup>2</sup>, Siriporn Vorakuldumrongchai<sup>2</sup>, Orwintinee Chusri<sup>2</sup>, Sithichoke Tangphatsornruang<sup>1</sup>, Wirulda Pootakham<sup>1,\*</sup>

<sup>1</sup> National Omics Center, National Center for Genetic Engineering and Biotechnology, National Science and Technology Development

Agency, 113 Thailand Science Park, Paholyothin Road, Khlong Nueng, Khlong Luang, Pathumthani, 12120, Thailand

<sup>2</sup> Chantaburi Horticultural Research Center, Department of Agriculture, Chanthaburi, 22110, Thailand

\* Corresponding author

## Supplementary Tables and Figures

**Supplementary Table S1:** Subset of the longest PacBio reads showing full coverage and large read overlap of the durian chloroplast genome assembly

| ReadId | match              | identity | align.len | mismatches | gaps | q.start | q.end | s.start | s.end | E value | Bit score | Read Length |
|--------|--------------------|----------|-----------|------------|------|---------|-------|---------|-------|---------|-----------|-------------|
| 10202  | Durian_chloroplast | 99.81    | 51147     | 2          | 89   | 1       | 51076 | 2197    | 53317 | 0       | 91477     | 51076       |
| 18069  | Durian_chloroplast | 99.51    | 34331     | 14         | 128  | 1       | 34203 | 6782    | 41087 | 0       | 60720     | 34206       |
| 509    | Durian_chloroplast | 99.79    | 27070     | 3          | 37   | 1       | 27029 | 12706   | 39762 | 0       | 48443     | 27029       |
| 6301   | Durian_chloroplast | 99.61    | 28675     | 9          | 65   | 1       | 28610 | 13657   | 42294 | 0       | 51011     | 28610       |
| 9750   | Durian_chloroplast | 99.83    | 26038     | 2          | 35   | 1       | 26000 | 16035   | 42068 | 0       | 46638     | 26000       |
| 24053  | Durian_chloroplast | 99.58    | 30154     | 6          | 93   | 1       | 30043 | 17054   | 47196 | 0       | 53492     | 30043       |
| 17662  | Durian_chloroplast | 99.74    | 34100     | 18         | 62   | 2       | 34052 | 18389   | 52465 | 0       | 60875     | 34052       |
| 17165  | Durian_chloroplast | 99.53    | 26601     | 10         | 73   | 1       | 26512 | 20114   | 46688 | 0       | 47182     | 26512       |
| 21065  | Durian_chloroplast | 99.77    | 28115     | 3          | 53   | 1       | 28064 | 21513   | 49615 | 0       | 50223     | 28064       |
| 17915  | Durian_chloroplast | 99.87    | 26998     | 0          | 29   | 1       | 26968 | 24864   | 51857 | 0       | 48434     | 26968       |
| 1872   | Durian_chloroplast | 99.86    | 25154     | 1          | 29   | 1       | 25129 | 27430   | 52574 | 0       | 45105     | 25129       |
| 6494   | Durian_chloroplast | 99.85    | 27557     | 1          | 32   | 1       | 27524 | 27549   | 1     | 0       | 49399     | 28730       |
| 2653   | Durian_chloroplast | 99.95    | 25118     | 3          | 9    | 1       | 25109 | 27713   | 52830 | 0       | 45211     | 25109       |
| 7381   | Durian_chloroplast | 99.95    | 25492     | 0          | 14   | 1       | 25479 | 28224   | 53714 | 0       | 45859     | 25479       |
| 15242  | Durian_chloroplast | 99.78    | 30145     | 2          | 55   | 1       | 30089 | 30150   | 60287 | 0       | 53878     | 30089       |
| 14860  | Durian_chloroplast | 99.68    | 27152     | 16         | 57   | 3       | 27104 | 32459   | 5330  | 0       | 48376     | 27104       |
| 22006  | Durian_chloroplast | 99.84    | 25236     | 0          | 32   | 1       | 25201 | 32972   | 7743  | 0       | 45218     | 25201       |
| 2086   | Durian_chloroplast | 99.77    | 32485     | 4          | 52   | 1       | 32425 | 34695   | 67169 | 0       | 58078     | 32425       |

|       |                    |       |       |    |     |   |       |       |        |   |       |       |
|-------|--------------------|-------|-------|----|-----|---|-------|-------|--------|---|-------|-------|
| 2169  | Durian_chloroplast | 99.63 | 27120 | 3  | 73  | 1 | 27028 | 34791 | 61906  | 0 | 48219 | 27028 |
| 9087  | Durian_chloroplast | 99.83 | 28584 | 0  | 37  | 1 | 28539 | 35257 | 6678   | 0 | 51204 | 28539 |
| 18789 | Durian_chloroplast | 99.88 | 32762 | 2  | 33  | 1 | 32727 | 35355 | 68114  | 0 | 58791 | 32727 |
| 16314 | Durian_chloroplast | 99.83 | 27465 | 0  | 42  | 1 | 27423 | 36387 | 63845  | 0 | 49168 | 27423 |
| 963   | Durian_chloroplast | 99.21 | 30226 | 14 | 185 | 1 | 30007 | 38343 | 8123   | 0 | 52803 | 30007 |
| 12310 | Durian_chloroplast | 99.47 | 28821 | 4  | 126 | 1 | 28682 | 39091 | 10282  | 0 | 50849 | 28682 |
| 9009  | Durian_chloroplast | 99.74 | 29502 | 4  | 65  | 2 | 29446 | 41157 | 70641  | 0 | 52625 | 29446 |
| 7205  | Durian_chloroplast | 99.88 | 27429 | 2  | 29  | 1 | 27402 | 41375 | 68799  | 0 | 49213 | 27402 |
| 23824 | Durian_chloroplast | 99.87 | 29516 | 0  | 34  | 1 | 29488 | 44311 | 14805  | 0 | 52942 | 29488 |
| 2182  | Durian_chloroplast | 99.77 | 25622 | 4  | 36  | 1 | 25575 | 44944 | 19330  | 0 | 45832 | 25575 |
| 20648 | Durian_chloroplast | 99.88 | 25827 | 0  | 27  | 1 | 25799 | 45384 | 19560  | 0 | 46346 | 25799 |
| 10787 | Durian_chloroplast | 99.75 | 29791 | 1  | 64  | 1 | 29724 | 45548 | 75332  | 0 | 53168 | 29724 |
| 1097  | Durian_chloroplast | 99.86 | 27662 | 1  | 34  | 1 | 27630 | 46411 | 74066  | 0 | 49590 | 27630 |
| 17383 | Durian_chloroplast | 99.85 | 35008 | 6  | 39  | 1 | 34965 | 46857 | 81861  | 0 | 62763 | 34965 |
| 24195 | Durian_chloroplast | 99.41 | 29658 | 12 | 127 | 1 | 29506 | 47253 | 17607  | 0 | 52270 | 29506 |
| 20621 | Durian_chloroplast | 99.65 | 28495 | 17 | 67  | 1 | 28442 | 50033 | 78496  | 0 | 50706 | 28442 |
| 600   | Durian_chloroplast | 99.74 | 27028 | 2  | 39  | 1 | 26972 | 50164 | 23148  | 0 | 48315 | 26972 |
| 11343 | Durian_chloroplast | 99.89 | 25326 | 4  | 23  | 1 | 25304 | 50780 | 25457  | 0 | 45464 | 25304 |
| 3418  | Durian_chloroplast | 99.88 | 28956 | 0  | 27  | 1 | 28929 | 51136 | 80084  | 0 | 51974 | 28929 |
| 18288 | Durian_chloroplast | 99.86 | 33881 | 0  | 40  | 1 | 33838 | 52238 | 86112  | 0 | 60744 | 33838 |
| 8816  | Durian_chloroplast | 99.84 | 26809 | 1  | 36  | 1 | 26778 | 53264 | 80062  | 0 | 48032 | 26778 |
| 22992 | Durian_chloroplast | 99.83 | 26877 | 0  | 39  | 2 | 26837 | 54045 | 80916  | 0 | 48127 | 26837 |
| 16645 | Durian_chloroplast | 99.82 | 25505 | 0  | 42  | 4 | 25468 | 54441 | 79940  | 0 | 45644 | 25468 |
| 17397 | Durian_chloroplast | 99.68 | 25084 | 10 | 37  | 1 | 25018 | 54833 | 29754  | 0 | 44771 | 25018 |
| 23939 | Durian_chloroplast | 99.55 | 28025 | 5  | 103 | 1 | 27910 | 55948 | 27930  | 0 | 49617 | 27910 |
| 17006 | Durian_chloroplast | 99.64 | 25275 | 5  | 80  | 1 | 25194 | 57095 | 31827  | 0 | 44883 | 25194 |
| 2389  | Durian_chloroplast | 99.72 | 25626 | 5  | 59  | 1 | 25575 | 58789 | 84397  | 0 | 45680 | 25575 |
| 1558  | Durian_chloroplast | 99.85 | 28352 | 0  | 37  | 1 | 28315 | 59329 | 30984  | 0 | 50807 | 28315 |
| 15241 | Durian_chloroplast | 99.73 | 32186 | 10 | 63  | 1 | 32129 | 62341 | 30177  | 0 | 57433 | 32129 |
| 1576  | Durian_chloroplast | 99.85 | 30132 | 1  | 41  | 1 | 30108 | 62778 | 92889  | 0 | 53992 | 30108 |
| 580   | Durian_chloroplast | 99.88 | 26571 | 0  | 30  | 1 | 26543 | 63345 | 36778  | 0 | 47671 | 26543 |
| 15399 | Durian_chloroplast | 99.85 | 37446 | 1  | 32  | 1 | 37412 | 63378 | 100803 | 0 | 67185 | 37412 |
| 2759  | Durian_chloroplast | 99.83 | 25385 | 0  | 39  | 1 | 25344 | 64334 | 89717  | 0 | 45451 | 25344 |
| 24874 | Durian_chloroplast | 99.95 | 27219 | 0  | 13  | 1 | 27207 | 64538 | 91754  | 0 | 48977 | 27207 |
| 5213  | Durian_chloroplast | 99.85 | 28884 | 0  | 34  | 1 | 28844 | 65983 | 37104  | 0 | 51777 | 28844 |
| 9154  | Durian_chloroplast | 99.89 | 29016 | 0  | 21  | 1 | 28986 | 67153 | 96165  | 0 | 52113 | 28986 |
| 10810 | Durian_chloroplast | 99.65 | 25886 | 14 | 45  | 1 | 25844 | 68381 | 94232  | 0 | 46142 | 25844 |
| 1373  | Durian_chloroplast | 99.87 | 29353 | 0  | 31  | 1 | 29318 | 68781 | 98131  | 0 | 52661 | 29318 |

|       |                    |       |       |    |     |   |       |        |        |   |       |       |
|-------|--------------------|-------|-------|----|-----|---|-------|--------|--------|---|-------|-------|
| 8050  | Durian_chloroplast | 99.9  | 25472 | 0  | 26  | 1 | 25446 | 69122  | 94593  | 0 | 45725 | 25446 |
| 8532  | Durian_chloroplast | 99.61 | 37307 | 7  | 83  | 1 | 37210 | 71094  | 108359 | 0 | 66376 | 37210 |
| 11172 | Durian_chloroplast | 99.75 | 28796 | 1  | 37  | 1 | 28747 | 71701  | 100475 | 0 | 51507 | 28747 |
| 4548  | Durian_chloroplast | 99.45 | 28289 | 6  | 127 | 1 | 28162 | 72084  | 100350 | 0 | 49878 | 28162 |
| 11396 | Durian_chloroplast | 99.91 | 25216 | 3  | 18  | 1 | 25200 | 73464  | 98676  | 0 | 45310 | 25200 |
| 21519 | Durian_chloroplast | 99.77 | 26135 | 3  | 39  | 1 | 26087 | 74666  | 48540  | 0 | 46740 | 26087 |
| 3481  | Durian_chloroplast | 99.83 | 25662 | 0  | 37  | 1 | 25633 | 75127  | 49481  | 0 | 45952 | 25633 |
| 7291  | Durian_chloroplast | 99.72 | 35040 | 4  | 54  | 1 | 34971 | 75434  | 110448 | 0 | 62590 | 34971 |
| 18872 | Durian_chloroplast | 99.9  | 31088 | 0  | 30  | 1 | 31060 | 77947  | 46863  | 0 | 55817 | 31060 |
| 23224 | Durian_chloroplast | 99.84 | 25482 | 2  | 33  | 1 | 25444 | 78371  | 52892  | 0 | 45651 | 25444 |
| 2658  | Durian_chloroplast | 99.16 | 30603 | 4  | 116 | 1 | 30379 | 80271  | 110845 | 0 | 53739 | 30379 |
| 8236  | Durian_chloroplast | 99.48 | 29207 | 10 | 85  | 1 | 29068 | 81858  | 52654  | 0 | 51734 | 29068 |
| 8979  | Durian_chloroplast | 99.89 | 29559 | 1  | 28  | 1 | 29530 | 82116  | 52561  | 0 | 53060 | 29530 |
| 24335 | Durian_chloroplast | 99.84 | 33744 | 3  | 46  | 1 | 33698 | 82419  | 48682  | 0 | 60444 | 33698 |
| 8695  | Durian_chloroplast | 99.82 | 28578 | 1  | 42  | 1 | 28533 | 82675  | 54103  | 0 | 51162 | 28537 |
| 2144  | Durian_chloroplast | 99.64 | 25030 | 5  | 61  | 1 | 24989 | 84283  | 109269 | 0 | 44539 | 24989 |
| 20468 | Durian_chloroplast | 99.89 | 29652 | 0  | 26  | 1 | 29623 | 84412  | 54766  | 0 | 53234 | 29623 |
| 5581  | Durian_chloroplast | 99.79 | 37931 | 0  | 51  | 1 | 37871 | 85184  | 123094 | 0 | 67885 | 37871 |
| 10247 | Durian_chloroplast | 99.77 | 27343 | 3  | 34  | 3 | 27320 | 85543  | 112850 | 0 | 48926 | 27320 |
| 8922  | Durian_chloroplast | 99.76 | 28564 | 1  | 50  | 1 | 28499 | 89133  | 60572  | 0 | 51040 | 28502 |
| 17055 | Durian_chloroplast | 99.84 | 29388 | 2  | 41  | 1 | 29347 | 90978  | 61594  | 0 | 52645 | 29347 |
| 16826 | Durian_chloroplast | 99.9  | 25218 | 0  | 17  | 1 | 25201 | 91099  | 65889  | 0 | 45314 | 25201 |
| 6011  | Durian_chloroplast | 99.82 | 27169 | 0  | 30  | 1 | 27142 | 91782  | 118927 | 0 | 48681 | 27142 |
| 17421 | Durian_chloroplast | 99.79 | 28418 | 5  | 41  | 1 | 28382 | 94907  | 123305 | 0 | 50843 | 28382 |
| 9465  | Durian_chloroplast | 99.65 | 31002 | 6  | 80  | 1 | 30922 | 94992  | 125972 | 0 | 55157 | 30922 |
| 18297 | Durian_chloroplast | 99.8  | 39102 | 8  | 60  | 1 | 39039 | 95563  | 56471  | 0 | 69950 | 39039 |
| 7349  | Durian_chloroplast | 99.78 | 28091 | 0  | 42  | 1 | 28050 | 95972  | 124041 | 0 | 50246 | 28050 |
| 9155  | Durian_chloroplast | 99.89 | 27990 | 5  | 22  | 1 | 27970 | 96190  | 68208  | 0 | 50257 | 27970 |
| 9580  | Durian_chloroplast | 99.88 | 27425 | 0  | 30  | 1 | 27396 | 98713  | 71292  | 0 | 49208 | 27396 |
| 24063 | Durian_chloroplast | 99.05 | 29436 | 38 | 130 | 1 | 29208 | 101253 | 71833  | 0 | 51451 | 29208 |
| 3548  | Durian_chloroplast | 99.67 | 26139 | 10 | 47  | 1 | 26095 | 102017 | 75912  | 0 | 46603 | 26095 |
| 23417 | Durian_chloroplast | 99.6  | 33332 | 8  | 100 | 1 | 33226 | 103211 | 136522 | 0 | 59169 | 33226 |
| 2682  | Durian_chloroplast | 99.63 | 26662 | 18 | 51  | 1 | 26590 | 104626 | 131279 | 0 | 47482 | 26590 |
| 5334  | Durian_chloroplast | 99.71 | 31976 | 7  | 64  | 1 | 31932 | 104638 | 72705  | 0 | 57034 | 31932 |
| 6647  | Durian_chloroplast | 99.63 | 35396 | 1  | 97  | 1 | 35291 | 104646 | 69275  | 0 | 62926 | 35291 |
| 1132  | Durian_chloroplast | 99.54 | 25388 | 5  | 89  | 1 | 25299 | 106509 | 131872 | 0 | 44953 | 25300 |
| 5492  | Durian_chloroplast | 99.68 | 27286 | 4  | 34  | 1 | 27221 | 108391 | 81125  | 0 | 48733 | 27221 |
| 1551  | Durian_chloroplast | 99.88 | 26847 | 1  | 31  | 1 | 26823 | 109503 | 136341 | 0 | 48156 | 26823 |

|       |                    |       |       |    |     |      |       |        |        |   |       |       |
|-------|--------------------|-------|-------|----|-----|------|-------|--------|--------|---|-------|-------|
| 736   | Durian_chloroplast | 99.7  | 30284 | 7  | 52  | 1    | 30230 | 110195 | 79942  | 0 | 54044 | 30230 |
| 11530 | Durian_chloroplast | 99.84 | 30072 | 7  | 30  | 1    | 30048 | 112695 | 142750 | 0 | 53920 | 32039 |
| 23729 | Durian_chloroplast | 99.83 | 25329 | 1  | 37  | 1    | 25291 | 112764 | 138089 | 0 | 45359 | 25293 |
| 11186 | Durian_chloroplast | 99.84 | 28379 | 0  | 37  | 1    | 28338 | 112790 | 141165 | 0 | 50852 | 28338 |
| 1101  | Durian_chloroplast | 99.84 | 25696 | 0  | 33  | 1    | 25658 | 113682 | 139374 | 0 | 46043 | 25658 |
| 6792  | Durian_chloroplast | 99.86 | 25663 | 1  | 29  | 1    | 25635 | 113705 | 139359 | 0 | 46016 | 25635 |
| 17309 | Durian_chloroplast | 99.72 | 25824 | 7  | 40  | 1    | 25766 | 113800 | 139616 | 0 | 46124 | 25766 |
| 12008 | Durian_chloroplast | 99.76 | 27608 | 1  | 42  | 3    | 27565 | 114852 | 87265  | 0 | 49359 | 27565 |
| 16240 | Durian_chloroplast | 99.64 | 26679 | 8  | 67  | 1    | 26598 | 116080 | 142750 | 0 | 47453 | 26941 |
| 13153 | Durian_chloroplast | 99.9  | 26283 | 2  | 21  | 1    | 26261 | 116469 | 142750 | 0 | 47211 | 28915 |
| 1149  | Durian_chloroplast | 99.7  | 27689 | 2  | 57  | 4    | 27636 | 118476 | 90812  | 0 | 49379 | 27636 |
| 10413 | Durian_chloroplast | 99.8  | 35960 | 3  | 49  | 1    | 35914 | 119969 | 84033  | 0 | 64367 | 35914 |
| 21355 | Durian_chloroplast | 99.85 | 26107 | 3  | 35  | 1    | 26075 | 128379 | 102277 | 0 | 46780 | 26078 |
| 22909 | Durian_chloroplast | 99.79 | 25608 | 0  | 39  | 1    | 25558 | 128693 | 103090 | 0 | 45810 | 25558 |
| 1461  | Durian_chloroplast | 99.73 | 41727 | 7  | 72  | 1    | 41653 | 129358 | 87665  | 0 | 74507 | 41653 |
| 23096 | Durian_chloroplast | 99.82 | 27044 | 2  | 43  | 1    | 27001 | 130254 | 103216 | 0 | 48394 | 27001 |
| 1454  | Durian_chloroplast | 99.73 | 30281 | 0  | 61  | 1    | 30203 | 133023 | 102748 | 0 | 54033 | 30203 |
| 2464  | Durian_chloroplast | 99.51 | 37254 | 12 | 125 | 1    | 37115 | 133150 | 95928  | 0 | 65952 | 37115 |
| 17200 | Durian_chloroplast | 99.69 | 27232 | 7  | 69  | 3    | 27167 | 135317 | 108097 | 0 | 48486 | 27167 |
| 13304 | Durian_chloroplast | 99.85 | 26526 | 0  | 35  | 1    | 26487 | 135380 | 108855 | 0 | 47538 | 26487 |
| 11635 | Durian_chloroplast | 99.87 | 29003 | 1  | 30  | 1    | 28979 | 135406 | 106416 | 0 | 52033 | 28979 |
| 1919  | Durian_chloroplast | 99.89 | 28597 | 0  | 29  | 1    | 28575 | 135612 | 107025 | 0 | 51328 | 28575 |
| 8048  | Durian_chloroplast | 99.92 | 31837 | 0  | 19  | 1    | 31817 | 142320 | 110488 | 0 | 57242 | 31817 |
| 8064  | Durian_chloroplast | 99.8  | 36030 | 0  | 62  | 3252 | 39221 | 142750 | 106733 | 0 | 64437 | 39221 |
| 21264 | Durian_chloroplast | 99.96 | 27147 | 0  | 11  | 1586 | 28721 | 142750 | 115605 | 0 | 48863 | 28721 |

**Supplementary Table S2:** Subset of the longest PacBio reads showing the cyclic nature of the durian chloroplast genome assembly

| Read Id | match              | identity | align.len | mismatches | gaps | q.start | q.end | s.start | s.end  | E value | Bit score | Read Length |
|---------|--------------------|----------|-----------|------------|------|---------|-------|---------|--------|---------|-----------|-------------|
| 1119    | Durian_chloroplast | 99.82    | 25833     | 2          | 35   | 1       | 25799 | 25823   | 1      | 0       | 46261     | 29787       |
| 1119    | Durian_chloroplast | 99.38    | 4008      | 0          | 22   | 25800   | 29787 | 142750  | 138748 | 0       | 7039      | 29787       |
| 1844    | Durian_chloroplast | 99.83    | 25904     | 1          | 38   | 1       | 25870 | 25894   | 1      | 0       | 46380     | 30194       |
| 1844    | Durian_chloroplast | 99.33    | 4343      | 6          | 20   | 25871   | 30194 | 142750  | 138412 | 0       | 7633      | 30194       |
| 8064    | Durian_chloroplast | 99.57    | 3264      | 0          | 14   | 1       | 3251  | 3263    | 1      | 0       | 5773      | 39221       |
| 8064    | Durian_chloroplast | 99.8     | 36030     | 0          | 62   | 3252    | 39221 | 142750  | 106733 | 0       | 64437     | 39221       |
| 11726   | Durian_chloroplast | 99.73    | 7117      | 0          | 19   | 1       | 7100  | 7115    | 1      | 0       | 12680     | 34293       |
| 11726   | Durian_chloroplast | 99.64    | 27279     | 5          | 55   | 7101    | 34291 | 142750  | 115476 | 0       | 48593     | 34293       |



|       |                    |       |       |    |    |       |       |        |        |   |       |       |
|-------|--------------------|-------|-------|----|----|-------|-------|--------|--------|---|-------|-------|
| 13694 | Durian_chloroplast | 99.66 | 8172  | 0  | 19 | 1     | 8147  | 8169   | 1      | 0 | 14550 | 27962 |
| 13694 | Durian_chloroplast | 99.86 | 19838 | 0  | 20 | 8148  | 27962 | 142750 | 122917 | 0 | 35588 | 27962 |
| 17952 | Durian_chloroplast | 99.66 | 15486 | 3  | 29 | 1     | 15440 | 15483  | 1      | 0 | 27607 | 27773 |
| 17952 | Durian_chloroplast | 98.89 | 12436 | 19 | 54 | 15441 | 27773 | 142750 | 130331 | 0 | 21668 | 27773 |
| 20313 | Durian_chloroplast | 99.87 | 8554  | 0  | 11 | 1     | 8545  | 8552   | 1      | 0 | 15337 | 28540 |
| 20313 | Durian_chloroplast | 99.89 | 20017 | 0  | 16 | 8546  | 28540 | 142750 | 122734 | 0 | 35947 | 28540 |
| 21112 | Durian_chloroplast | 99.87 | 8460  | 0  | 11 | 3     | 8455  | 8456   | 1      | 0 | 15167 | 25690 |
| 21112 | Durian_chloroplast | 99.87 | 17242 | 2  | 11 | 8456  | 25690 | 142750 | 125523 | 0 | 30959 | 25690 |

**Supplementary Table S3:** Thai name, English name and sample number of the 24 Thai durian varieties that were sequenced

| Number | Thai name              | English name   |
|--------|------------------------|----------------|
| 41     | สายหยุด                | Suwai Yut      |
| 42     | ก้านยาว                | Ganyao         |
| 43     | ก้านยาววัดสัก          | Ganyao Wat Sak |
| 44     | ก้านยาวสีนาค           | Ganyao Sinak   |
| 45     | ชมภูพาน                | Chomphu Phan   |
| 46     | ทองสุก                 | Thongsuk       |
| 47     | หมอนทอง                | Monthong       |
| 48     | กำปั้งเดิม (กำปั้งขาว) | Gumpan Deum    |
| 57     | กำปั้งพวง              | Gumpan Phuang  |
| 58     | ฉัตรสีทอง              | Chat Sithong   |
| 59     | ธรณีไหว                | Thoraniwai     |
| 60     | นกหยิบ                 | Nokyip         |
| 61     | นมสวรรค์               | Nomsawan       |
| 62     | ทองย้อยฉัตร            | Thong Yoi Chat |
| 63     | กระดุมทอง              | Gratum Thong   |
| 64     | พวงมณี                 | Phuang Mani    |
| 73     | กบตาซำ                 | Kop Thakham    |

|    |            |              |
|----|------------|--------------|
| 74 | กบตาหัวม   | Kop Thathuam |
| 75 | กบแม่เผ่า  | Kop Maethao  |
| 76 | กบสุวรรณ   | Kop Suwan    |
| 77 | กบวัดกล้วย | Kop Watkluai |
| 78 | ชมพู่ศรี   | Chomphu Si   |
| 79 | หลวง       | Luang        |
| 80 | ย่ามะหาด   | Yum Mahaat   |

**Supplementary Table S4:** Potentially heteroplasmic chloroplast SNPs identified from 24 Thai varieties and the Musang King variety of durian. Call per sample is indicated as Ref: same as our chloroplast assembly; or Alt, Alt2; first or second allele in the ALT column, respectively. Samples that appear heteroplasmic are given both allele calls. Number of reads that support each allele are given in the brackets in the order Ref, Alt, Alt2

| POS   | REF | ALT | X41                   | X43                  | X46                  | X62                  | X75               | X79               | Mk                  |
|-------|-----|-----|-----------------------|----------------------|----------------------|----------------------|-------------------|-------------------|---------------------|
| 36    | A   | T   | Ref (224,24)          | Ref (210,39)         | Ref (220,27)         | Ref (215,34)         | Ref/Alt (142,108) | Ref (171,78)      | Ref (249,0)         |
| 41    | A   | C   | Ref (213,37)          | Ref (181,67)         | Ref (201,48)         | Ref (192,56)         | Ref/Alt (100,149) | Alt (86,162)      | Ref (250,0)         |
| 54    | A   | C   | Ref (205,43)          | Ref (193,55)         | Ref (197,52)         | Ref (192,58)         | Ref/Alt (138,112) | Ref/Alt (138,111) | Ref (248,1)         |
| 55    | C   | A   | Ref (186,62)          | Ref (175,73)         | Ref (186,61)         | Ref (173,76)         | Ref/Alt (137,111) | Ref/Alt (129,120) | Ref (250,0)         |
| 64    | G   | A   | Ref (216,33)          | Ref (197,52)         | Ref (215,33)         | Ref (196,54)         | Ref (165,83)      | Ref/Alt (146,103) | Ref (250,0)         |
| 66    | G   | C   | Ref (185,63)          | Ref (184,65)         | Ref (194,54)         | Ref (179,70)         | Ref (166,84)      | Ref/Alt (140,108) | Ref (250,0)         |
| 73    | A   | C   | Ref (230,15)          | Ref (196,53)         | Ref (214,35)         | Ref (201,49)         | Ref/Alt (121,128) | Ref/Alt (146,103) | Ref (247,0)         |
| 74    | C   | A   | Ref (227,23)          | Ref (187,61)         | Ref (209,40)         | Ref (204,44)         | Ref/Alt (117,131) | Ref/Alt (133,117) | Ref (247,2)         |
| 88    | C   | G   | Ref (217,18)          | Ref (183,53)         | Ref (220,18)         | Ref (208,36)         | Ref/Alt (129,112) | Ref (180,64)      | Ref (249,0)         |
| 121   | C   | A   | Ref (215,33)          | Ref (190,58)         | Ref (192,57)         | Ref (203,44)         | Ref (166,84)      | Ref/Alt (140,108) | Ref (248,0)         |
| 123   | A   | C   | Ref (212,37)          | Ref (181,68)         | Ref (195,54)         | Ref/Alt (148,101)    | Ref/Alt (152,96)  | Ref/Alt (152,98)  | Ref (250,0)         |
| 269   | C   | A,G | Ref/Alt (130,93,26)   | Ref (194,28,28)      | Ref (162,66,22)      | Ref (160,48,42)      | Ref (190,25,35)   | Ref (194,17,39)   | Ref (205,43,0)      |
| 1736  | C   | G   | Ref (225,24)          | Ref (203,46)         | Ref (212,38)         | Ref (183,65)         | Ref (155,94)      | Ref/Alt (148,102) | Ref (247,0)         |
| 2386  | C   | G   | Ref (231,18)          | Ref (201,49)         | Ref (209,39)         | Ref (208,42)         | Ref (162,88)      | Ref/Alt (149,100) | Ref (246,2)         |
| 13956 | G   | A   | Ref (166,6)           | Ref (238,7)          | Ref (238,10)         | Ref (246,3)          | Ref (119,12)      | Ref (174,8)       | Ref/Alt (113,133)   |
| 13960 | T   | A   | Ref (154,4)           | Ref (238,9)          | Ref (238,11)         | Ref (244,4)          | Ref (114,2)       | Ref (163,5)       | Ref/Alt (117,114)   |
| 14496 | T   | A   | Ref (248,1)           | Ref (160,85)         | Ref (154,95)         | Ref/Alt (144,104)    | Ref (248,1)       | Ref (248,1)       | Ref (208,18)        |
| 14498 | T   | A   | Ref (242,6)           | Ref (137,73)         | Ref (137,80)         | Ref/Alt (129,94)     | Ref (248,1)       | Ref (248,2)       | Ref (213,16)        |
| 14500 | T   | A   | Ref (248,1)           | Ref/Alt (128,121)    | Ref/Alt (134,115)    | Ref/Alt (121,128)    | Ref (248,1)       | Ref (248,2)       | Ref (177,71)        |
| 14501 | T   | A   | Ref (246,2)           | Ref/Alt (120,127)    | Ref/Alt (116,131)    | Ref/Alt (120,128)    | Ref (249,1)       | Ref (246,3)       | Ref (162,88)        |
| 22199 | A   | G,T | Ref (238,3,9)         | Ref/Alt (141,82,27)  | Ref/Alt (145,90,11)  | Ref/Alt (143,83,22)  | Ref (196,14,39)   | Ref (198,14,38)   | Ref (166,82,0)      |
| 22202 | A   | C,G | Ref (226,24,0)        | Ref (139,55,55)      | Ref (135,42,69)      | Ref/Alt (139,52,58)  | Ref (170,77,2)    | Ref (160,86,2)    | Ref (156,3,90)      |
| 22217 | C   | A,T | Ref (218,4,28)        | Ref/Alt (109,113,28) | Ref/Alt (107,112,30) | Ref/Alt (107,104,39) | Ref (162,10,71)   | Ref (161,9,80)    | Ref/Alt (141,103,6) |
| 23685 | A   | G   | Ref (245,2)           | Ref/Alt (99,118)     | Ref/Alt (95,117)     | Ref/Alt (93,95)      | Ref (247,0)       | Ref (245,2)       | Ref (173,47)        |
| 23869 | T   | A   | Ref (218,32)          | Ref (188,60)         | Ref (206,43)         | Ref (192,55)         | Ref (202,45)      | Ref/Alt (146,100) | Ref (247,0)         |
| 31406 | A   | T   | Ref/Alt (147,102)     | Ref (218,29)         | Ref (202,47)         | Ref (190,59)         | Ref (210,39)      | Ref (218,32)      | Ref (223,24)        |
| 31607 | T   | C,G | Ref/Alt2 (122,31,93)  | Ref (180,48,22)      | Ref (179,29,39)      | Ref (157,37,53)      | Ref (166,65,19)   | Ref (170,65,15)   | Ref (218,0,32)      |
| 31654 | A   | C,T | Ref/Alt (140,93,15)   | Ref (208,23,17)      | Ref (191,42,17)      | Ref (189,48,13)      | Ref (203,33,14)   | Ref (216,16,18)   | Ref (229,21,0)      |
| 31933 | T   | G   | Ref/Alt (142,102)     | Ref (225,21)         | Ref (219,28)         | Ref (198,49)         | Ref (226,22)      | Ref (232,15)      | Ref (226,23)        |
| 32453 | G   | A,C | Ref/Alt2 (130,13,106) | Ref (196,19,32)      | Ref (168,14,68)      | Ref (161,19,69)      | Ref (191,32,26)   | Ref (188,45,16)   | Ref (221,1,28)      |
| 32460 | A   | C,T | Ref/Alt (128,96,22)   | Ref (193,32,25)      | Ref (171,56,22)      | Ref (181,51,18)      | Ref (197,23,28)   | Ref (172,14,64)   | Ref (224,25,1)      |
| 32461 | C   | A,T | Ref/Alt2 (127,10,111) | Ref (191,23,36)      | Ref (174,9,67)       | Ref (170,17,63)      | Ref (202,19,28)   | Ref (180,45,23)   | Ref (225,1,22)      |
| 32684 | T   | G   | Ref/Alt (113,129)     | Ref (200,39)         | Ref (182,61)         | Ref (206,40)         | Ref (208,35)      | Ref (214,26)      | Ref (219,30)        |

|       |   |     |                      |                 |                   |                 |                   |                   |                  |
|-------|---|-----|----------------------|-----------------|-------------------|-----------------|-------------------|-------------------|------------------|
| 33914 | T | A   | Ref (27,0)           | Ref/Alt (36,33) | Ref/Alt (38,58)   | NA              | Ref (32,0)        | Ref (87,0)        | Ref (19,3)       |
| 33918 | T | A   | Ref (28,0)           | Ref/Alt (35,26) | Ref/Alt (51,47)   | NA              | Ref (34,1)        | Ref (89,3)        | Ref (23,3)       |
| 37098 | C | T   | Ref (214,26)         | Ref (224,25)    | Ref (227,22)      | Ref (222,28)    | Ref (204,43)      | Ref (215,34)      | Ref/Alt (139,97) |
| 39650 | C | A,G | Ref/Alt2 (130,46,73) | Ref (168,63,17) | Ref (163,52,33)   | Ref (148,60,41) | Ref (138,93,18)   | Ref (153,84,11)   | Ref (227,0,23)   |
| 39688 | A | C,T | Ref/Alt (140,76,33)  | Ref (175,21,52) | Ref (170,37,41)   | Ref (147,41,61) | Ref (169,23,58)   | Ref (206,12,32)   | Ref (228,22,0)   |
| 39692 | C | A,T | Ref/Alt2 (121,53,76) | Ref (182,50,17) | Ref (163,53,30)   | Ref (151,67,0)  | Ref (170,60,20)   | Ref (182,53,15)   | Ref (228,0,22)   |
| 39714 | C | A,G | Ref/Alt2 (143,26,80) | Ref (199,30,21) | Ref (179,16,55)   | Ref (182,28,40) | Ref (171,64,15)   | Ref (188,49,10)   | Ref (226,0,23)   |
| 39822 | A | G   | Ref/Alt (135,112)    | Ref (201,46)    | Ref (180,68)      | Ref (161,88)    | Ref (168,81)      | Ref (180,70)      | Ref (225,24)     |
| 39943 | G | C,T | Ref/Alt2 (136,37,75) | Ref (166,67,15) | Ref (178,39,32)   | Ref (164,48,38) | Ref (187,41,21)   | Ref (178,58,12)   | Ref (234,0,16)   |
| 39963 | A | C,G | Ref/Alt (136,73,41)  | Ref (203,19,27) | Ref (205,26,19)   | Ref (190,38,22) | Ref (210,16,23)   | Ref (202,16,31)   | Ref (239,10,1)   |
| 39970 | C | A,G | Ref/Alt2 (127,30,93) | Ref (194,29,23) | Ref (185,32,31)   | Ref (178,41,31) | Ref (185,44,20)   | Ref (184,53,11)   | Ref (232,1,17)   |
| 40063 | A | C   | Ref/Alt (143,104)    | Ref (204,43)    | Ref (189,59)      | Ref (188,61)    | Ref (193,55)      | Ref (188,61)      | Ref (232,18)     |
| 40201 | A | G,T | Ref/Alt (143,96,11)  | Ref (203,17,30) | Ref (190,45,15)   | Ref (181,45,24) | Ref (177,24,48)   | Ref (192,14,44)   | Ref (229,17,2)   |
| 46763 | A | G   | Ref (223,26)         | Ref (185,64)    | Ref (211,36)      | Ref (192,56)    | Ref (152,98)      | Ref/Alt (148,100) | Ref (249,1)      |
| 50952 | T | G   | Ref (208,36)         | Ref (160,85)    | Ref (190,55)      | Ref (173,73)    | Ref (168,77)      | Ref/Alt (149,100) | Ref (248,0)      |
| 52032 | A | C   | Ref (181,67)         | Ref (158,89)    | Ref/Alt (146,100) | Ref (160,89)    | Ref (191,58)      | Ref (187,63)      | Ref (249,0)      |
| 53028 | G | A,C | Ref/Alt (147,73,30)  | Ref (201,14,33) | Ref (193,38,18)   | Ref (161,57,31) | Ref (179,19,52)   | Ref (174,15,61)   | Ref (227,23,0)   |
| 53045 | T | A,C | Ref/Alt2 (145,25,79) | Ref (181,50,17) | Ref (190,23,35)   | Ref (158,30,62) | Ref (185,45,19)   | Ref (173,63,13)   | Ref (230,0,19)   |
| 53137 | C | A   | Ref/Alt (135,98)     | Ref (210,33)    | Ref (194,50)      | Ref (190,51)    | Ref (182,59)      | Ref (181,60)      | Ref (231,11)     |
| 53145 | A | G   | Ref (202,43)         | Ref (186,60)    | Ref (200,46)      | Ref (189,58)    | Ref (163,84)      | Ref/Alt (147,100) | Ref (248,0)      |
| 53310 | T | G   | Ref/Alt (145,105)    | Ref (206,41)    | Ref (194,55)      | Ref (168,79)    | Ref (202,44)      | Ref (189,57)      | Ref (233,17)     |
| 53311 | A | T   | Ref/Alt (136,97)     | Ref (197,46)    | Ref (189,50)      | Ref (164,73)    | Ref (201,46)      | Ref (187,56)      | Ref (233,16)     |
| 53325 | A | T   | Ref/Alt (129,99)     | Ref (207,40)    | Ref (184,56)      | Ref (166,70)    | Ref (208,42)      | Ref (191,53)      | Ref (230,17)     |
| 53326 | A | T   | Ref/Alt (146,103)    | Ref (231,18)    | Ref (210,39)      | Ref (181,67)    | Ref (228,18)      | Ref (224,25)      | Ref (239,11)     |
| 63277 | T | C   | Ref (217,31)         | Ref (168,81)    | Ref (193,57)      | Ref (171,76)    | Ref/Alt (147,101) | Ref (156,93)      | Ref (249,1)      |
| 75839 | T | A   | Ref (225,24)         | Ref (205,42)    | Ref (208,40)      | Ref (216,34)    | Ref (161,85)      | Ref/Alt (149,100) | Ref (249,0)      |
| 76101 | A | G   | Ref/Alt (149,100)    | Ref (197,49)    | Ref (200,50)      | Ref (195,53)    | Ref (184,65)      | Ref (196,52)      | Ref (241,9)      |
| 78469 | A | C,G | Ref/Alt2 (140,39,70) | Ref (184,32,32) | Ref (180,32,36)   | Ref (176,31,43) | Ref (180,35,32)   | Ref (197,32,19)   | Ref (230,0,19)   |
| 78616 | G | A,C | Ref/Alt (141,80,29)  | Ref (216,14,20) | Ref (186,45,15)   | Ref (194,37,19) | Ref (200,22,27)   | Ref (205,21,21)   | Ref (231,18,1)   |
| 78804 | A | C,G | Ref/Alt2 (148,19,81) | Ref (205,27,17) | Ref (188,24,35)   | Ref (185,19,45) | Ref (178,50,20)   | Ref (186,47,16)   | Ref (234,0,14)   |
| 79387 | T | C   | Ref/Alt (123,125)    | Ref (184,61)    | Ref (174,72)      | Ref (173,74)    | Ref (161,88)      | Ref (155,94)      | Ref (226,22)     |
| 79893 | T | G   | Ref/Alt (130,118)    | Ref (197,42)    | Ref (187,56)      | Ref (191,54)    | Ref (180,63)      | Ref (199,44)      | Ref (228,22)     |
| 81053 | T | C   | Ref/Alt (132,118)    | Ref (189,58)    | Ref (185,64)      | Ref (163,85)    | Ref/Alt (148,101) | Ref (179,71)      | Ref (228,19)     |
| 84943 | T | A,G | Ref/Alt2 (120,42,88) | Ref (178,48,18) | Ref (163,43,38)   | Ref (154,44,48) | Ref (172,57,19)   | Ref (162,71,15)   | Ref (226,0,24)   |
| 84944 | C | A,T | Ref/Alt (135,83,16)  | Ref (208,12,24) | Ref (182,37,25)   | Ref (169,42,34) | Ref (178,22,46)   | Ref (183,16,47)   | Ref (228,22,0)   |
| 85695 | A | T   | Ref (220,29)         | Ref (187,62)    | Ref (207,43)      | Ref (203,47)    | Ref/Alt (159,90)  | Ref/Alt (148,101) | Ref (249,0)      |
| 85846 | A | C,T | Ref/Alt2 (138,8,103) | Ref (210,20,20) | Ref (183,23,42)   | Ref (219,31,0)  | Ref (162,71,17)   | Ref (186,46,17)   | Ref (232,0,17)   |
| 87198 | T | C   | Ref (195,54)         | Ref (151,94)    | Ref (168,77)      | Ref (159,88)    | Ref/Alt (147,102) | Ref (148,98)      | Ref (249,0)      |

|        |   |     |                      |                 |                 |                   |                   |                   |                   |
|--------|---|-----|----------------------|-----------------|-----------------|-------------------|-------------------|-------------------|-------------------|
| 98674  | G | A   | Ref/Alt (128,114)    | Ref (201,48)    | Ref (160,86)    | Ref/Alt (143,106) | Ref (185,63)      | Ref (195,50)      | Ref (225,25)      |
| 99130  | A | T   | Ref (226,20)         | Ref (218,30)    | Ref (229,21)    | Ref (227,21)      | Ref (236,11)      | Ref (233,11)      | Ref/Alt (139,108) |
| 99134  | A | T   | Ref (224,25)         | Ref (201,49)    | Ref (228,21)    | Ref (231,17)      | Ref (230,18)      | Ref (228,15)      | Ref/Alt (130,119) |
| 99276  | A | T   | Ref (233,17)         | Ref (226,23)    | Ref (232,18)    | Ref (241,8)       | Ref (233,16)      | Ref (235,15)      | Ref/Alt (148,99)  |
| 101885 | G | A,C | Ref/Alt (146,80,24)  | Ref (191,26,32) | Ref (185,34,30) | Ref (189,35,26)   | Ref (181,24,45)   | Ref (178,11,61)   | Ref (225,23,0)    |
| 105329 | G | A   | Ref (230,4)          | Ref (242,4)     | Ref (248,2)     | Ref (241,7)       | Ref (241,2)       | Ref (225,7)       | Ref/Alt (136,105) |
| 105334 | G | A   | Ref (229,1)          | Ref (247,2)     | Ref (244,4)     | Ref (243,6)       | Ref (242,2)       | Ref (231,3)       | Ref/Alt (138,99)  |
| 105368 | C | A   | Ref (211,3)          | Ref (238,7)     | Ref (243,6)     | Ref (243,5)       | Ref (222,3)       | Ref (218,3)       | Ref/Alt (136,104) |
| 109574 | A | C   | Ref (218,20)         | Ref (156,86)    | Ref (153,85)    | Ref/Alt (148,99)  | Ref (191,47)      | Ref (205,37)      | Ref (249,1)       |
| 113885 | T | G   | Ref (224,22)         | Ref (182,59)    | Ref (207,39)    | Ref (211,34)      | Ref/Alt (145,102) | Ref/Alt (148,100) | Ref (246,1)       |
| 116800 | T | G   | Ref (229,19)         | Ref (197,50)    | Ref (216,32)    | Ref (215,34)      | Ref (151,97)      | Ref/Alt (145,101) | Ref (250,0)       |
| 116801 | A | T   | Ref (222,23)         | Ref (189,61)    | Ref (209,40)    | Ref (207,43)      | Ref (150,100)     | Ref/Alt (148,101) | Ref (250,0)       |
| 129772 | C | T   | Ref (220,25)         | Ref (205,44)    | Ref (210,39)    | Ref (208,41)      | Ref (200,50)      | Ref/Alt (147,101) | Ref (250,0)       |
| 132975 | T | C   | Ref (206,43)         | Ref (164,85)    | Ref (161,86)    | Ref/Alt (147,101) | Ref (198,51)      | Ref (187,62)      | Ref (249,1)       |
| 132976 | A | T   | Ref (209,38)         | Ref (159,87)    | Ref (165,84)    | Ref/Alt (149,101) | Ref (196,51)      | Ref (179,61)      | Ref (250,0)       |
| 133590 | A | C   | Ref (234,13)         | Ref (209,38)    | Ref (224,23)    | Ref (213,36)      | Ref (196,51)      | Ref/Alt (147,101) | Ref (249,1)       |
| 133591 | T | A   | Ref (230,20)         | Ref (193,57)    | Ref (221,28)    | Ref (210,39)      | Ref (187,62)      | Ref/Alt (149,100) | Ref (249,0)       |
| 134864 | C | A,T | Ref/Alt2 (140,20,88) | Ref (209,15,24) | Ref (190,23,37) | Ref (178,25,47)   | Ref (199,18,31)   | Ref (215,17,17)   | Ref (225,0,23)    |
| 134976 | A | G   | Ref/Alt (118,128)    | Ref (204,43)    | Ref (193,51)    | Ref (181,67)      | Ref (197,49)      | Ref (213,33)      | Ref (219,29)      |
| 135012 | T | G   | Ref/Alt (139,107)    | Ref (217,29)    | Ref (211,35)    | Ref (196,51)      | Ref (224,22)      | Ref (231,14)      | Ref (221,29)      |
| 135013 | C | A   | Ref/Alt (133,102)    | Ref (210,33)    | Ref (200,35)    | Ref (191,51)      | Ref (217,22)      | Ref (232,13)      | Ref (223,26)      |
| 135018 | T | G   | Ref/Alt (144,104)    | Ref (217,31)    | Ref (206,43)    | Ref (196,53)      | Ref (227,23)      | Ref (231,19)      | Ref (218,28)      |
| 135056 | G | T   | Ref/Alt (124,123)    | Ref (210,40)    | Ref (186,64)    | Ref (185,64)      | Ref (208,42)      | Ref (225,25)      | Ref (194,34)      |
| 135257 | T | A   | Ref (145,33)         | Ref (167,65)    | Ref (184,44)    | Ref (172,56)      | Ref (186,50)      | Ref/Alt (137,105) | Ref (230,6)       |
| 135258 | C | T   | Ref (140,25)         | Ref (155,74)    | Ref (182,38)    | Ref (165,60)      | Ref (186,44)      | Ref/Alt (136,97)  | Ref (227,1)       |
| 135453 | T | A   | Ref (218,31)         | Ref (203,45)    | Ref (217,32)    | Ref (202,46)      | Ref (150,96)      | Ref/Alt (147,101) | Ref (247,1)       |
| 137093 | C | G   | Ref (219,27)         | Ref (209,38)    | Ref (226,21)    | Ref (227,22)      | Ref/Alt (147,102) | Ref (166,80)      | Ref (247,0)       |
| 139136 | T | A   | Ref (234,15)         | Ref (223,26)    | Ref (232,16)    | Ref (230,19)      | Ref (239,11)      | Ref (234,12)      | Ref/Alt (137,109) |
| 142016 | A | G   | Ref (211,37)         | Ref (187,61)    | Ref (209,35)    | Ref (198,48)      | Ref (172,77)      | Ref/Alt (148,100) | Ref (249,0)       |

# Supplementary Figure S1: Read depth of durian sample 41 Suwai Yut against our chloroplast and the published chloroplast

41 Read Depth vs Our Durian Chloroplast

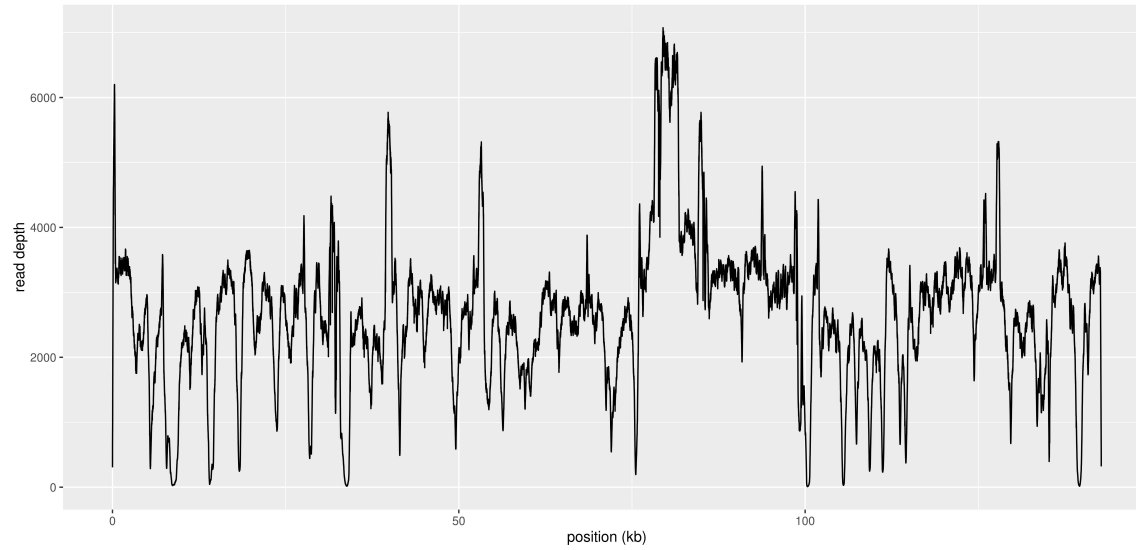

41 Read Depth vs Published Durian Chloroplast

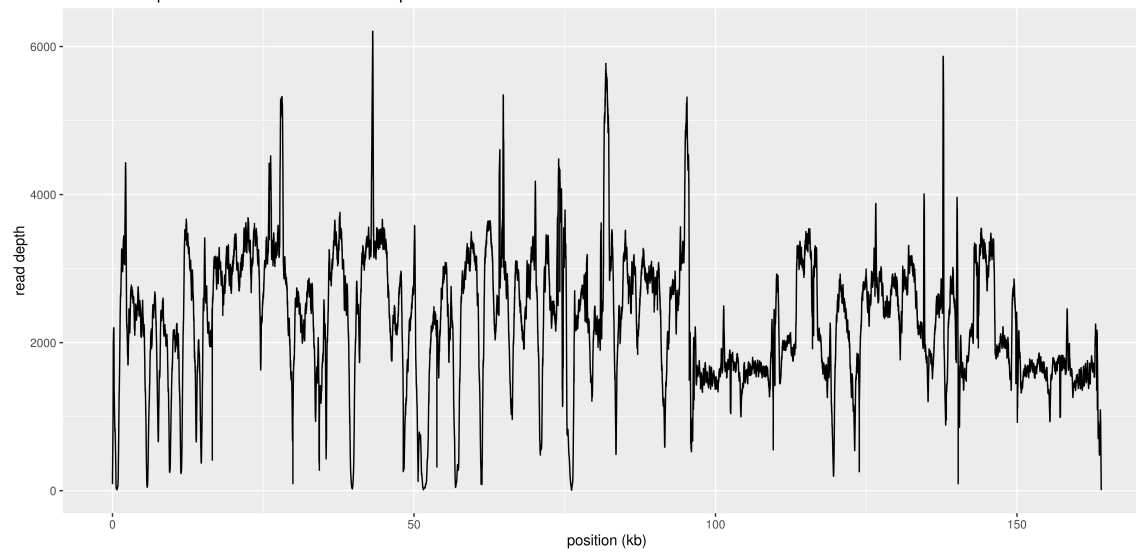

# Supplementary Figure S2: Read depth of durian sample 42 Ganyao against our chloroplast and the published chloroplast

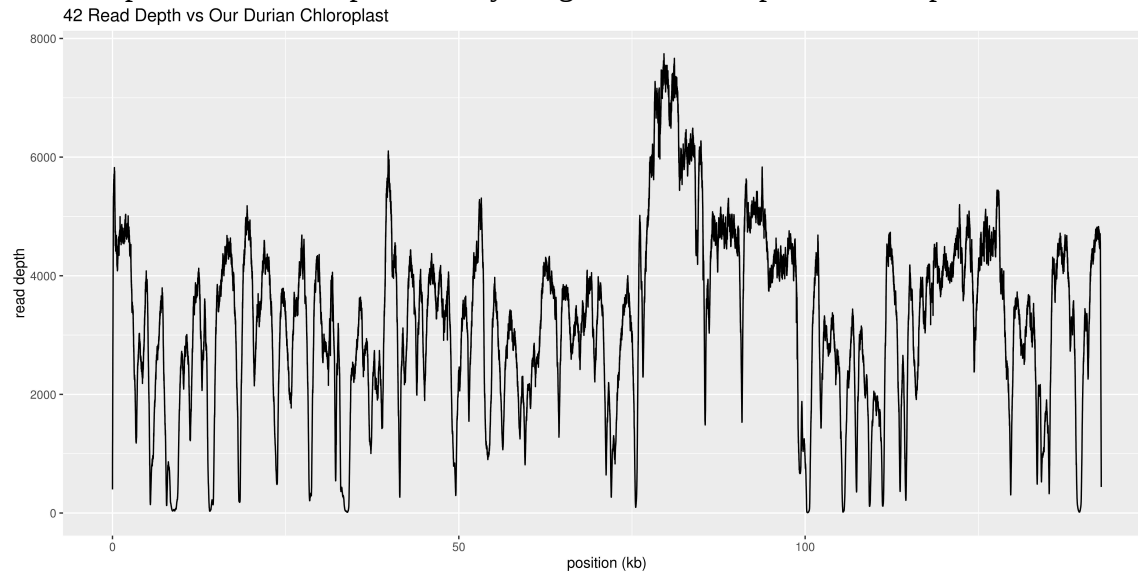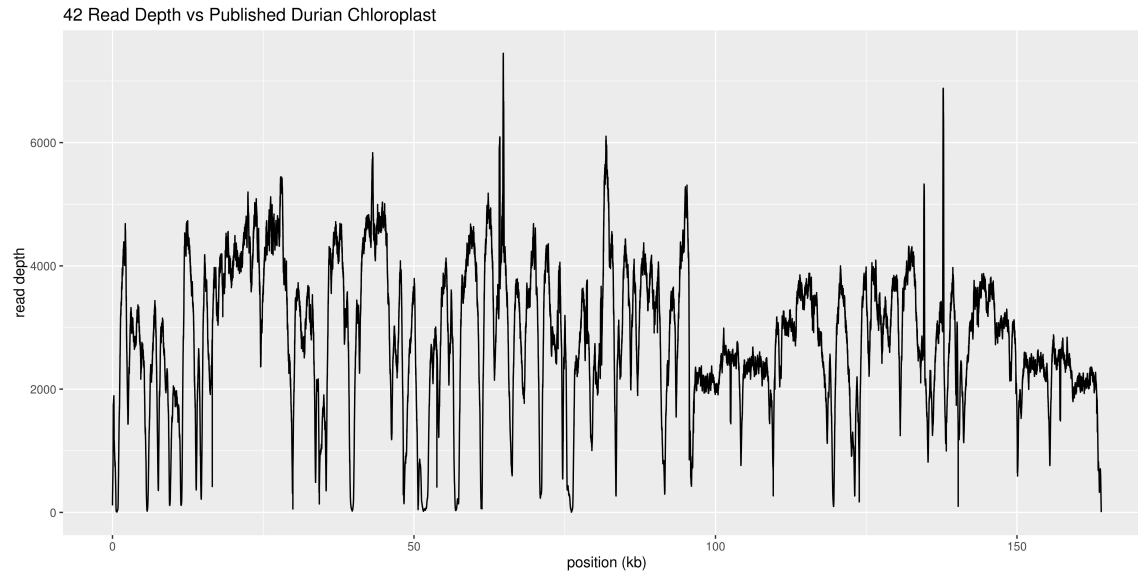

### Supplementary Figure S3: Read depth of durian sample 43 Ganyao Wat Sak against our chloroplast and the published chloroplast

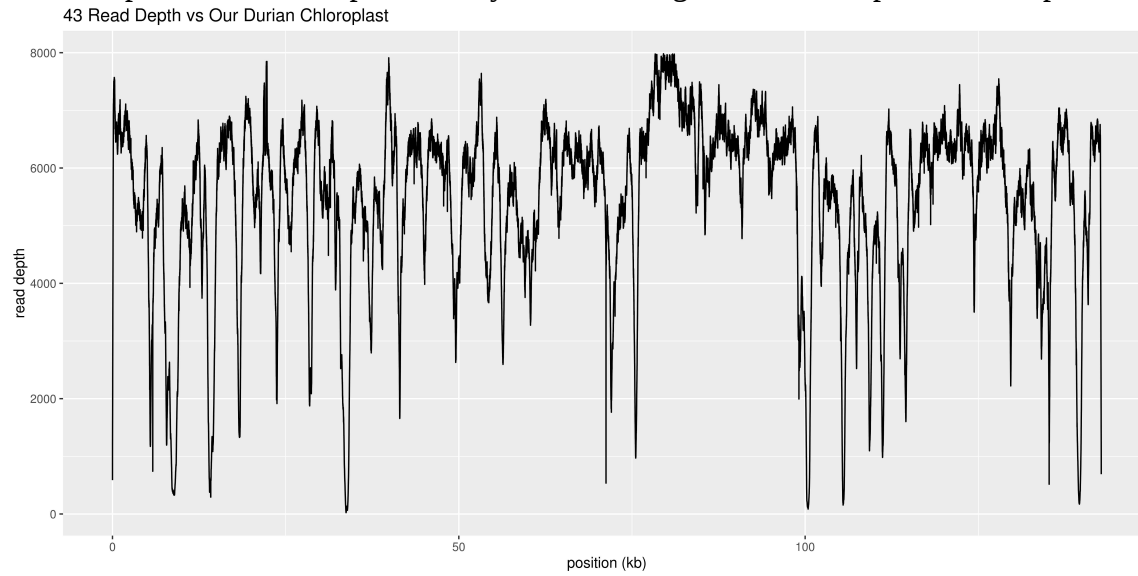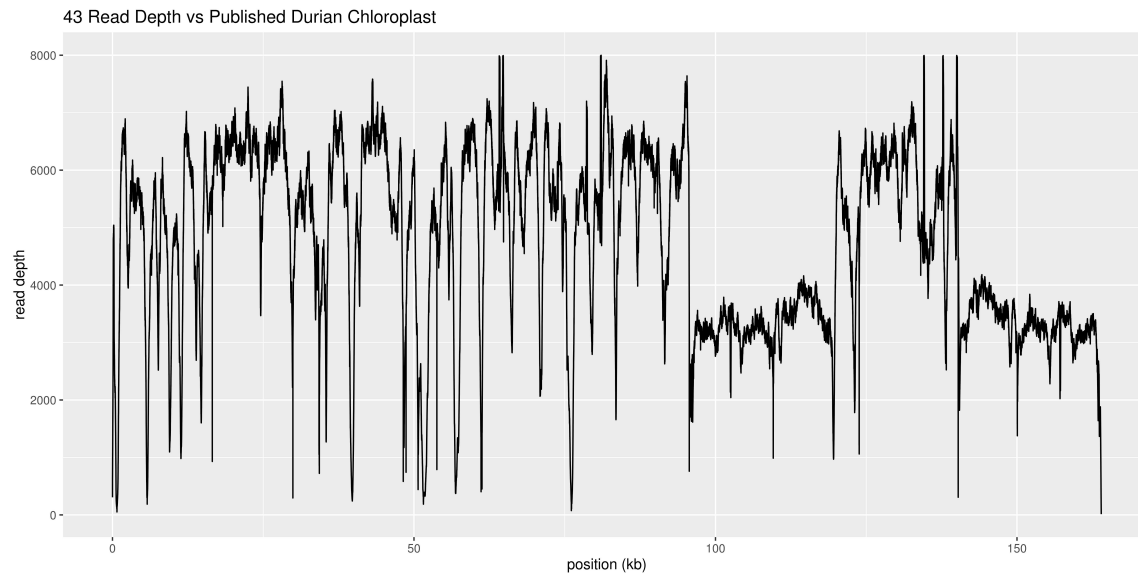



Supplementary Figure S4: Read depth of durian sample 44 Ganyao Sinak against our chloroplast and the published chloroplast

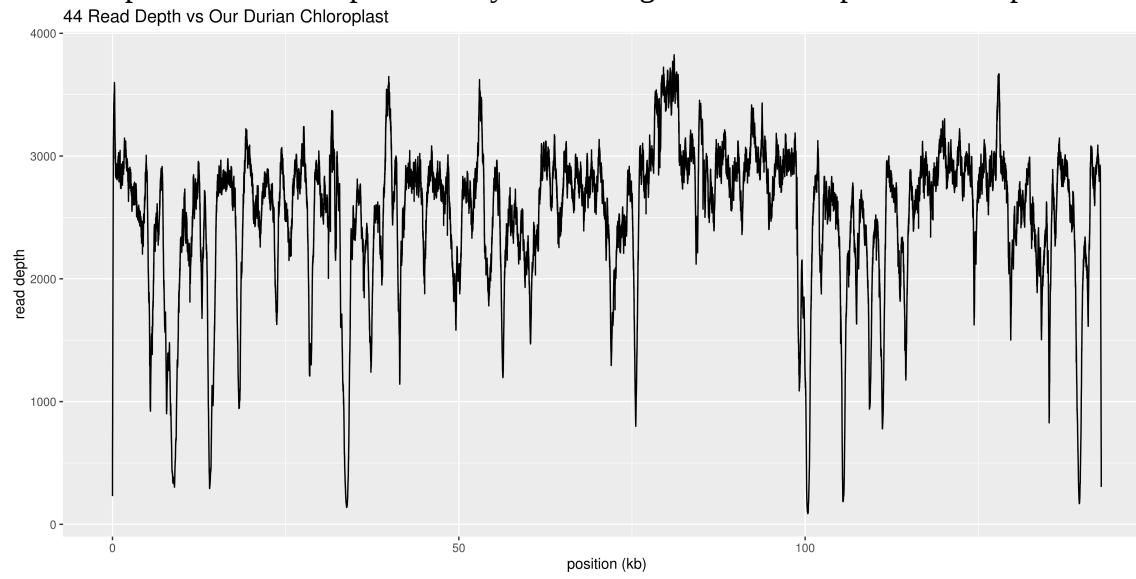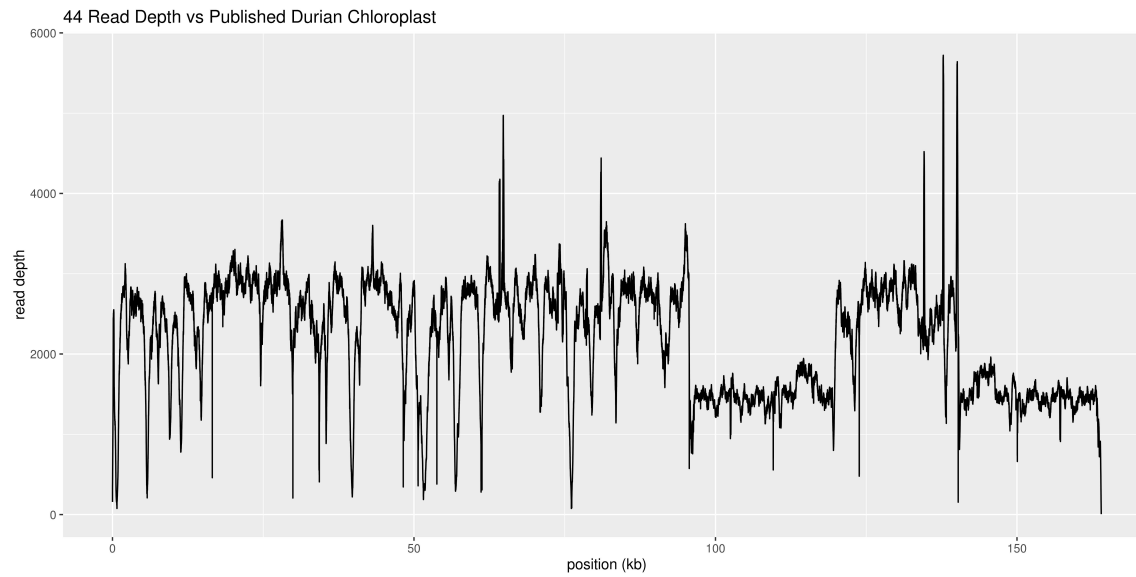

# Supplementary Figure S5: Read depth of durian sample 45 Chompu Phan against our chloroplast and the published chloroplast

45 Read Depth vs Our Durian Chloroplast

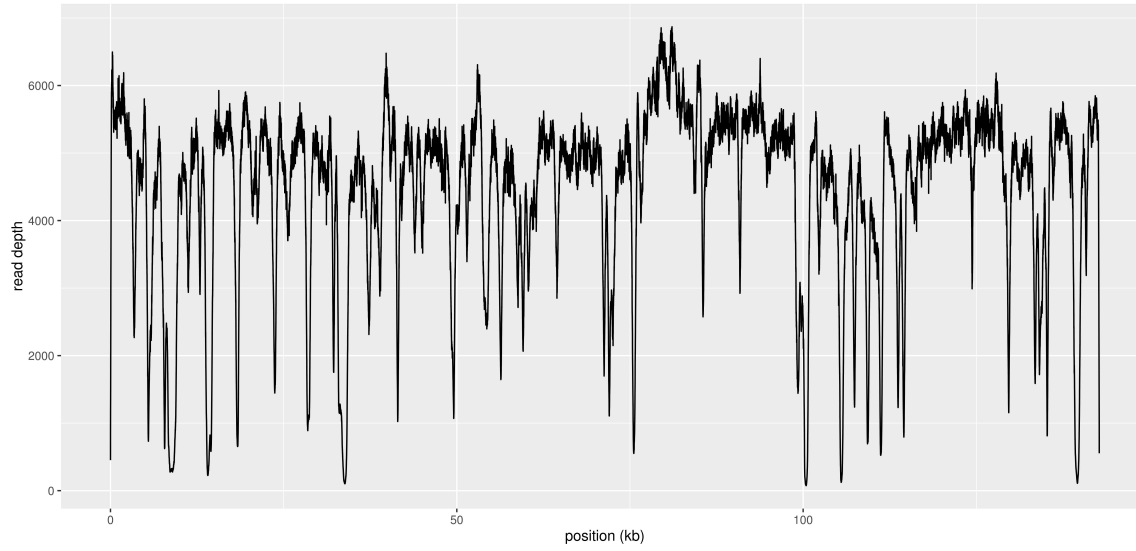

45 Read Depth vs Published Durian Chloroplast

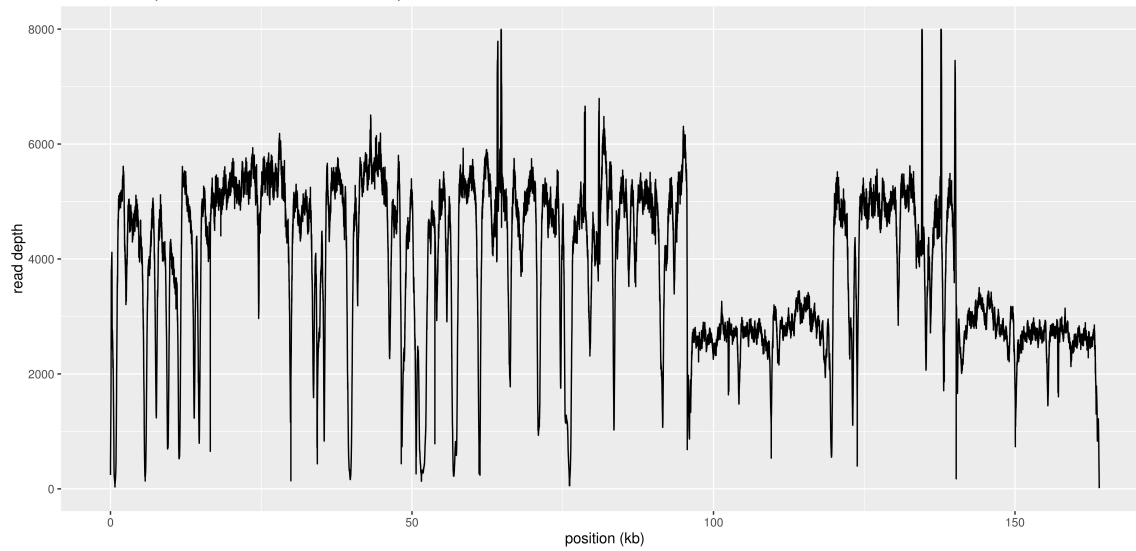

# Supplementary Figure S6: Read depth of durian sample 46 Thongsuk against our chloroplast and the published chloroplast

46 Read Depth vs Our Durian Chloroplast

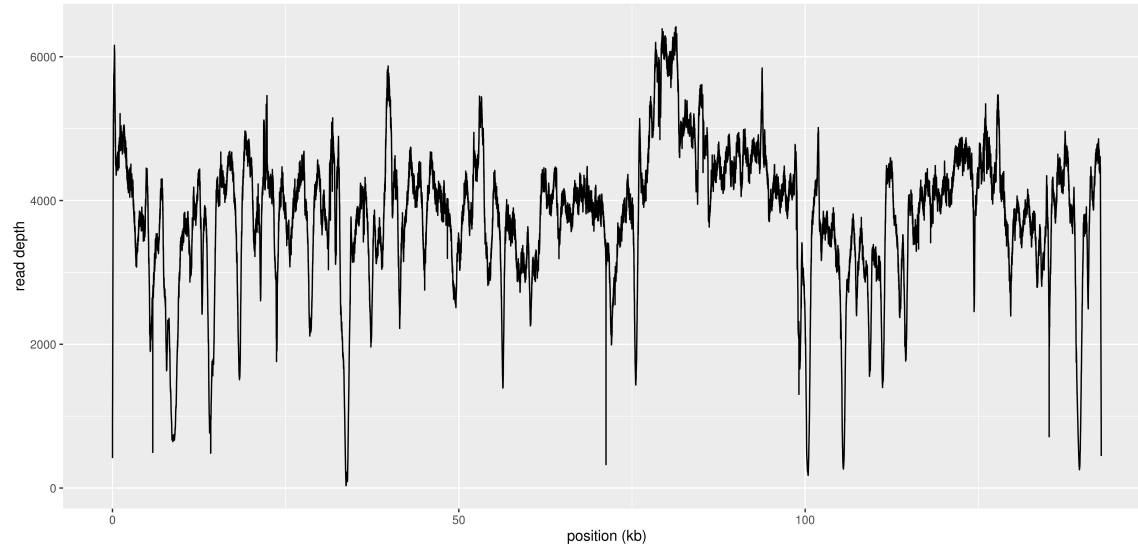

46 Read Depth vs Published Durian Chloroplast

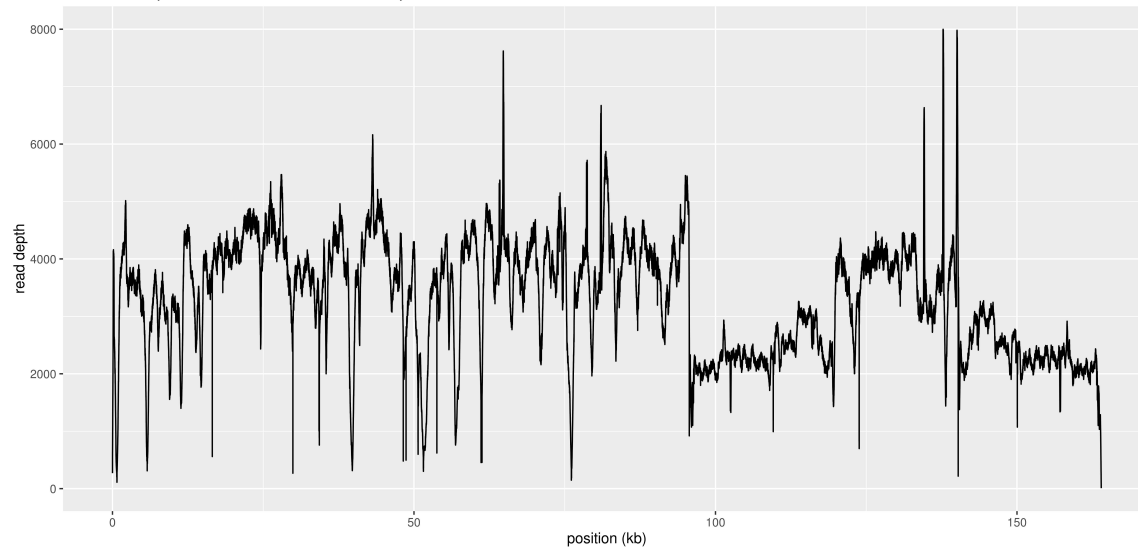

Supplementary Figure S7: Read depth of durian sample 47 Monthong against our chloroplast and the published chloroplast

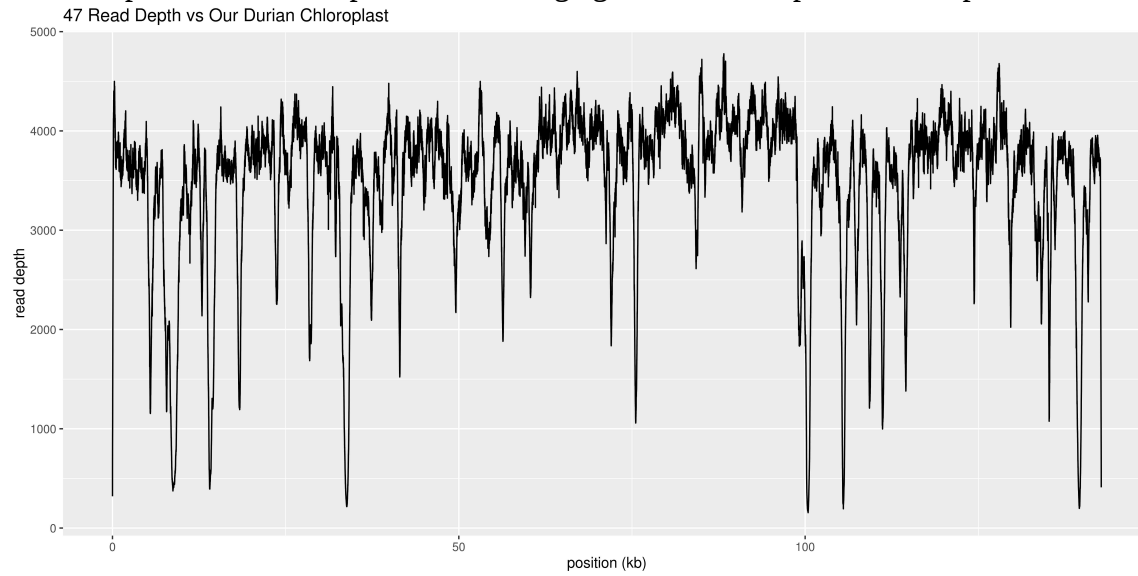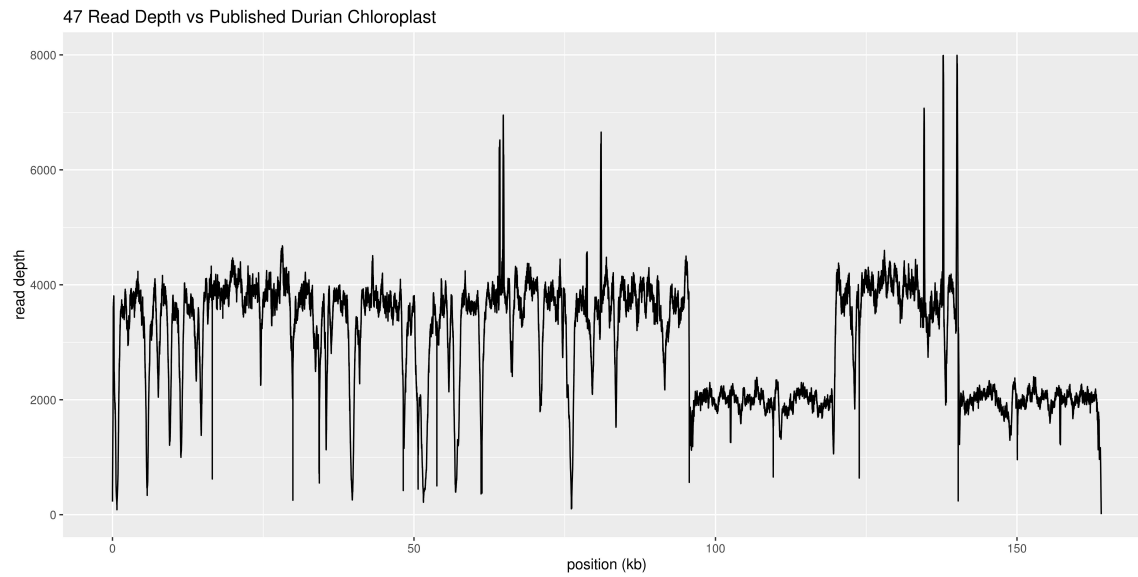

# Supplementary Figure S8: Read depth of durian sample 48 Gumpan Deum against our chloroplast and the published chloroplast

## 48 Read Depth vs Our Durian Chloroplast

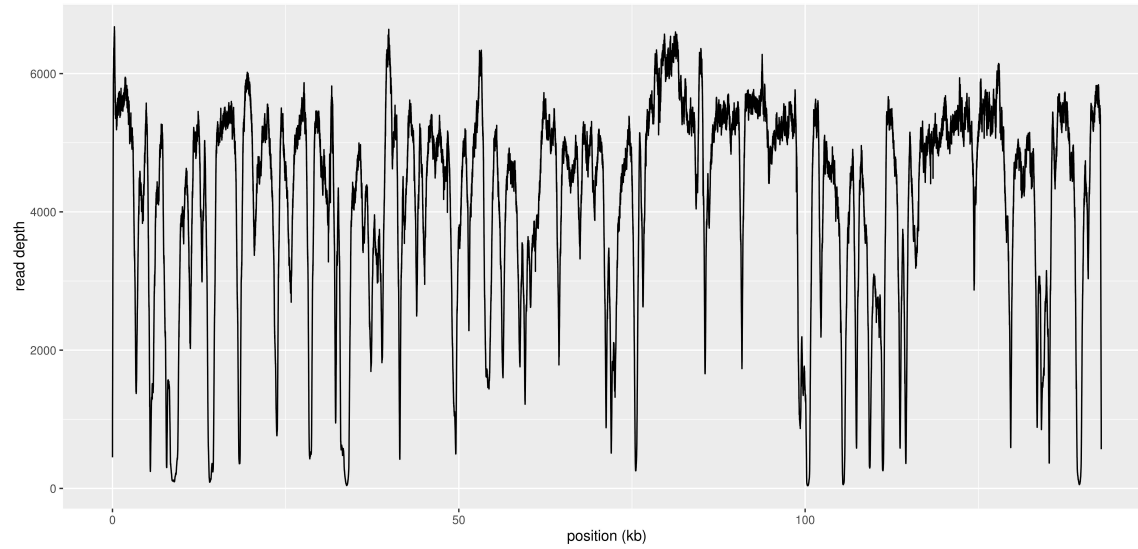

## 48 Read Depth vs Published Durian Chloroplast

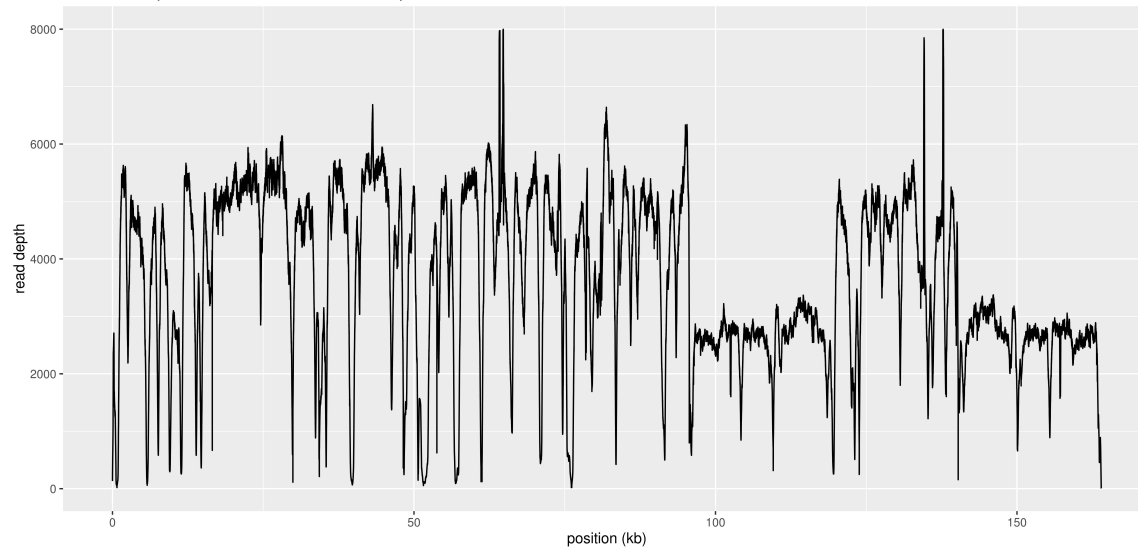

# Supplementary Figure S9: Read depth of durian sample 57 Gumpan Phung against our chloroplast and the published chloroplast

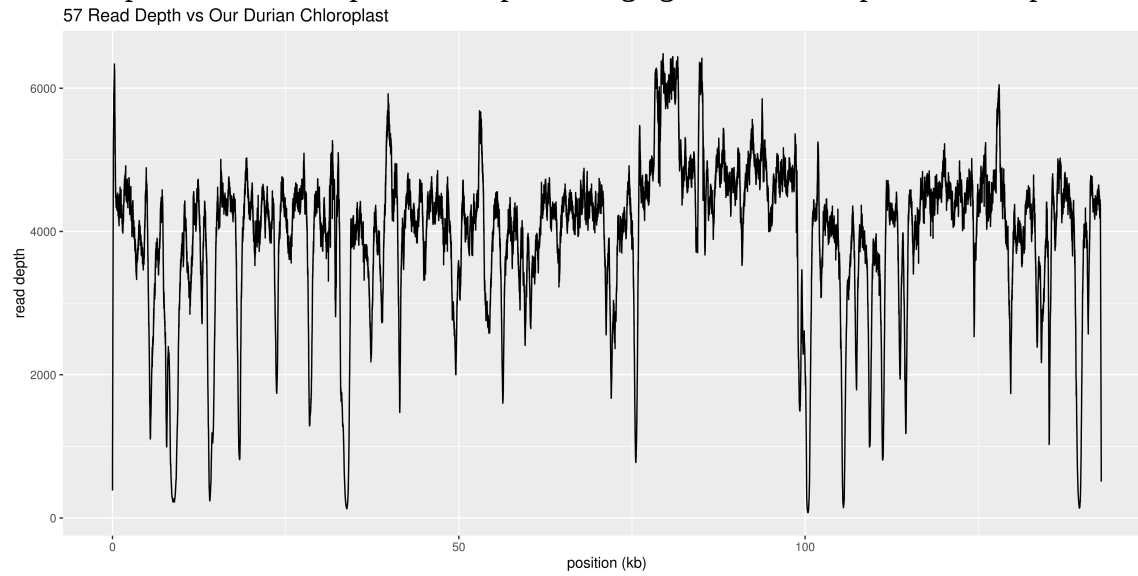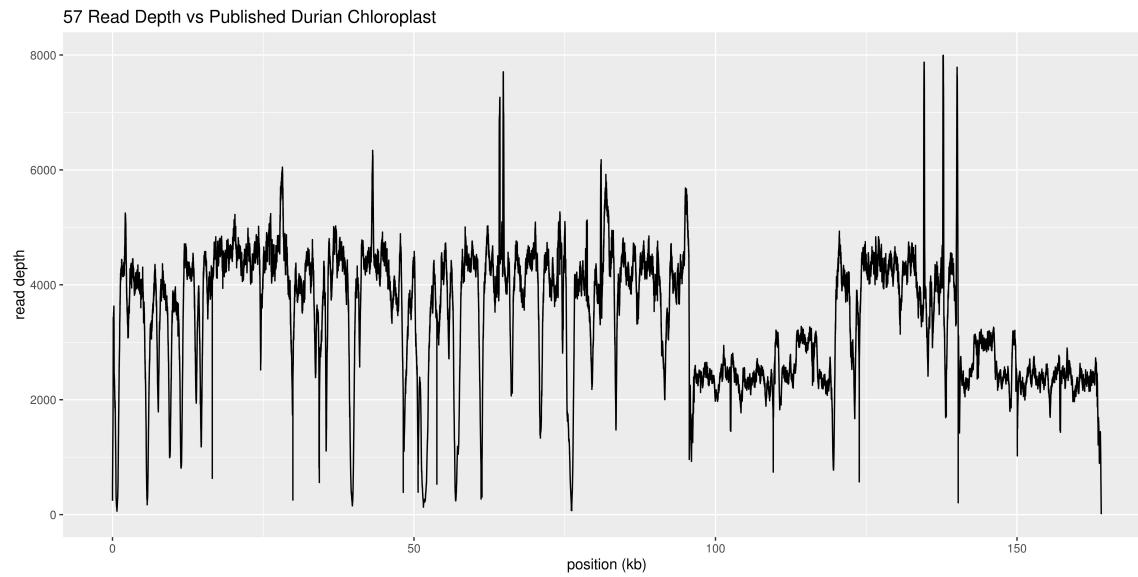

# Supplementary Figure S10: Read depth of durian sample 58 Chat Sithong against our chloroplast and the published chloroplast

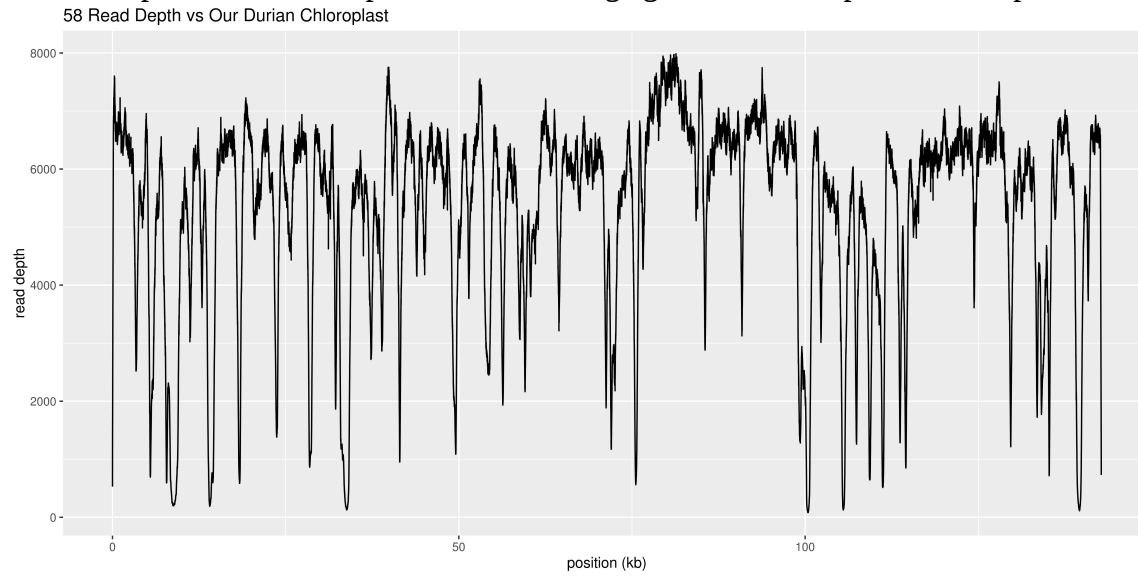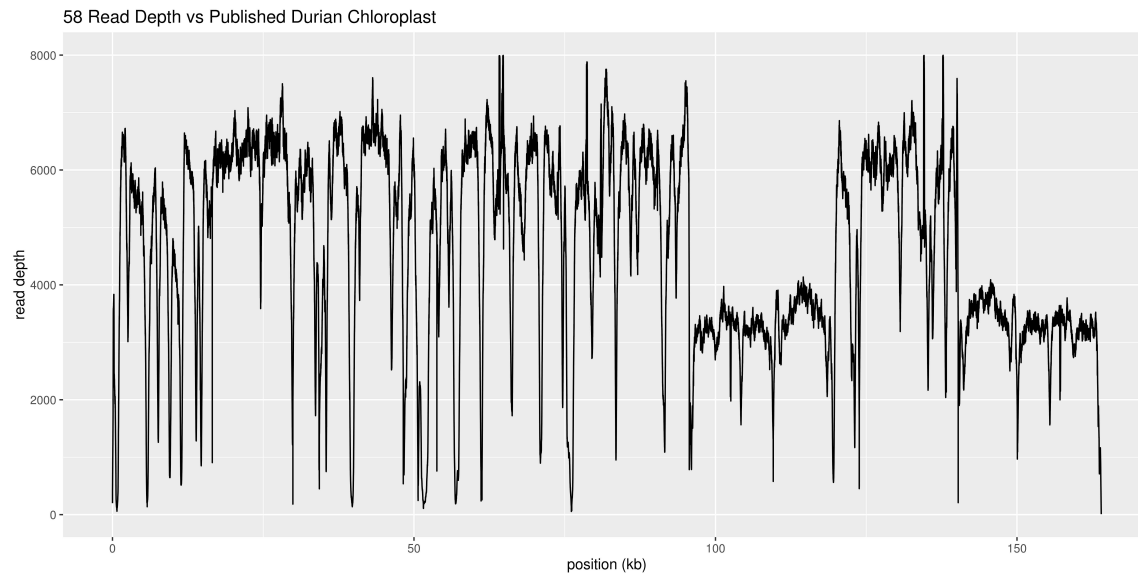

# Supplementary Figure S11: Read depth of durian sample 59 Thoraniwai against our chloroplast and the published chloroplast

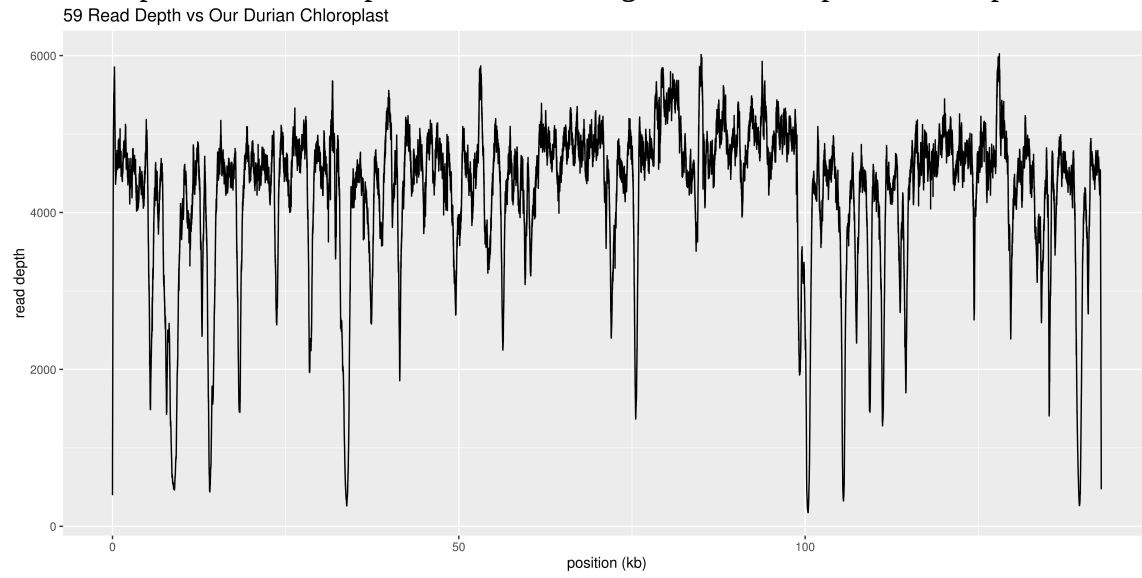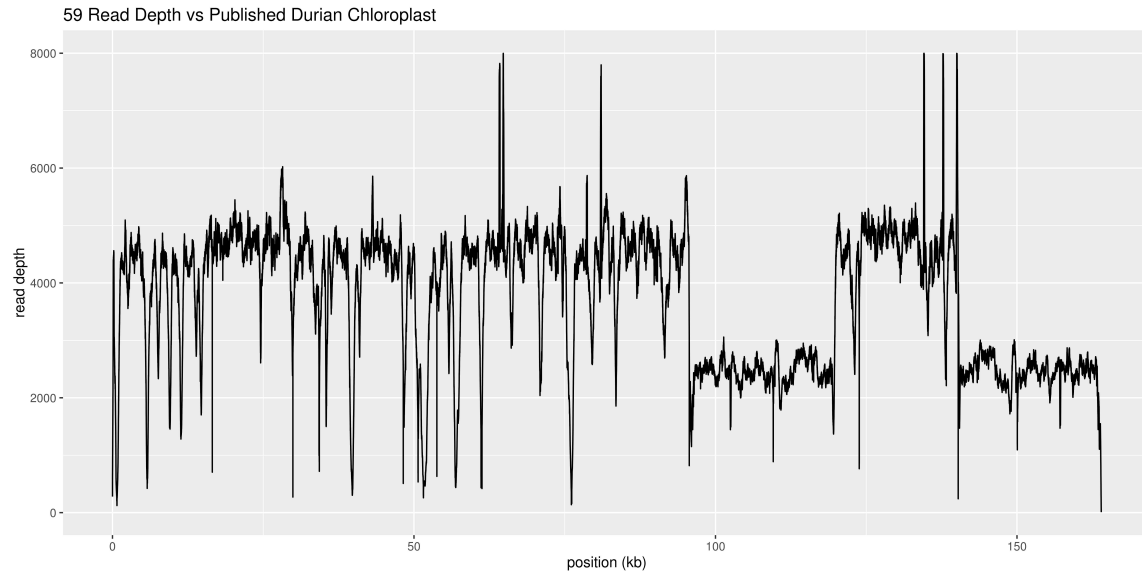



# Supplementary Figure S12: Read depth of durian sample 60 Nokyip against our chloroplast and the published chloroplast

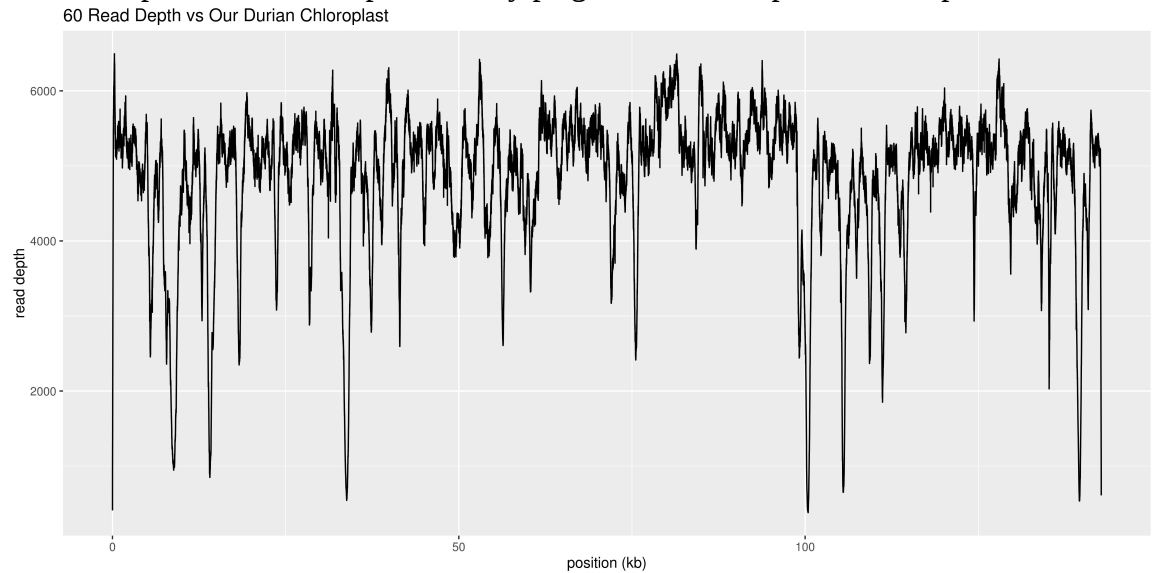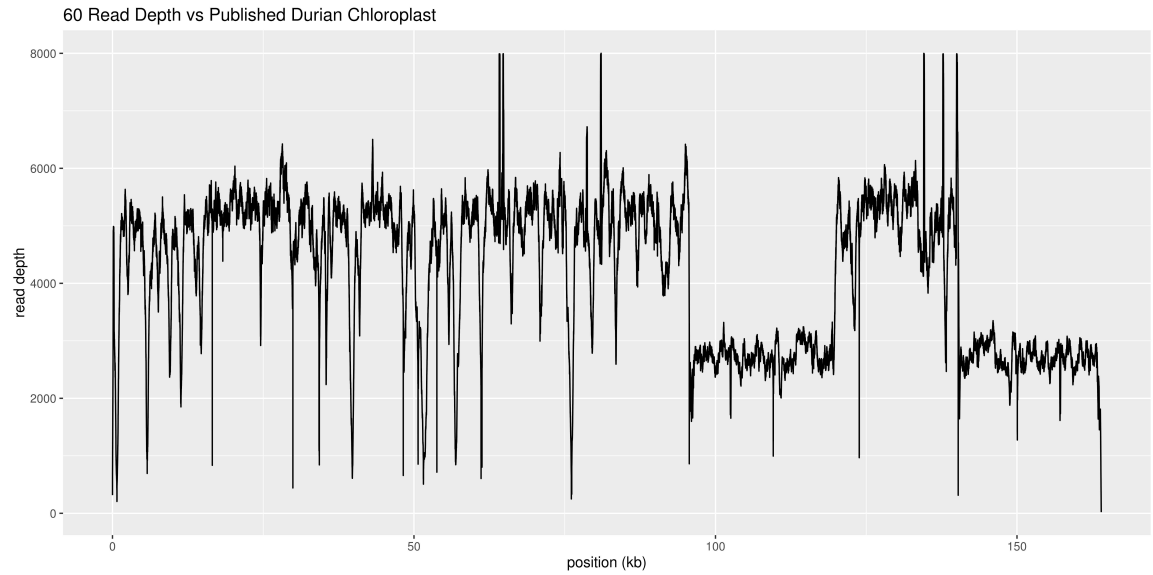

# Supplementary Figure S13: Read depth of durian sample 61 Nomsawan against our chloroplast and the published chloroplast

61 Read Depth vs Our Durian Chloroplast

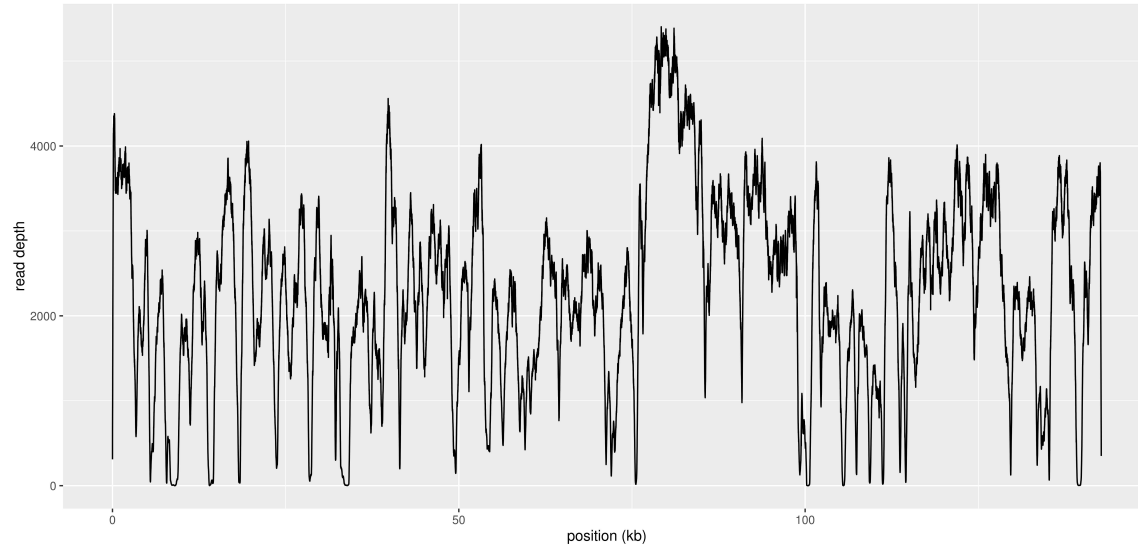

61 Read Depth vs Published Durian Chloroplast

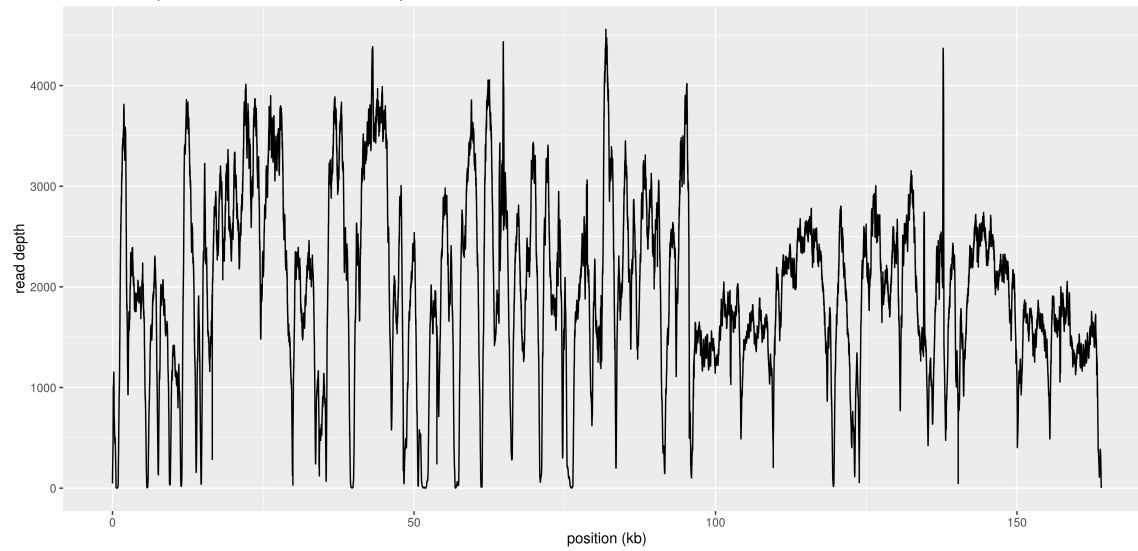

Supplementary Figure S14: Read depth of durian sample 62 Thong Yoi Chat against our chloroplast and the published chloroplast

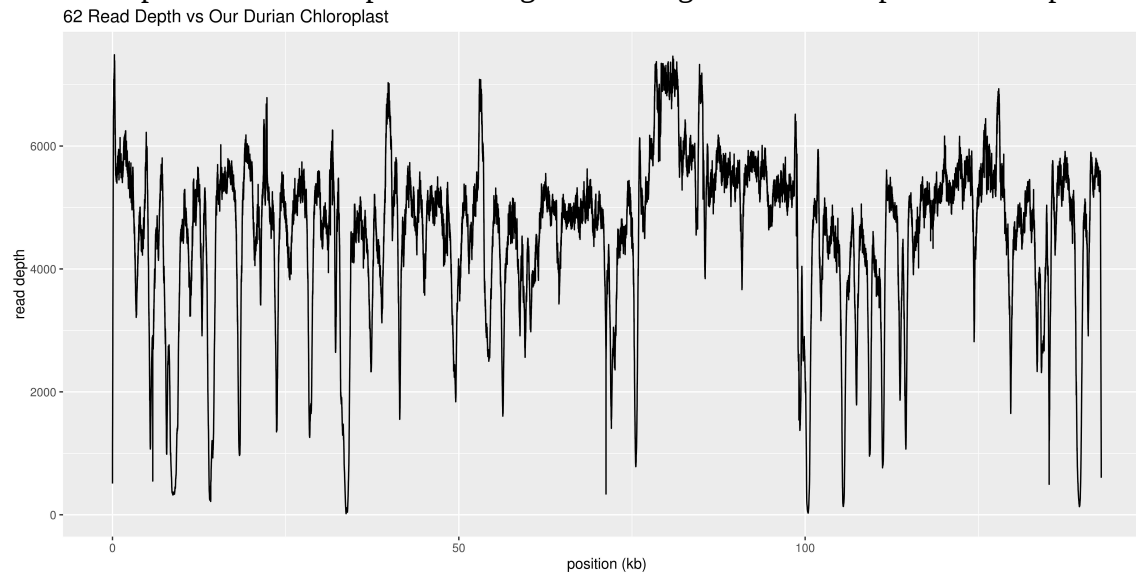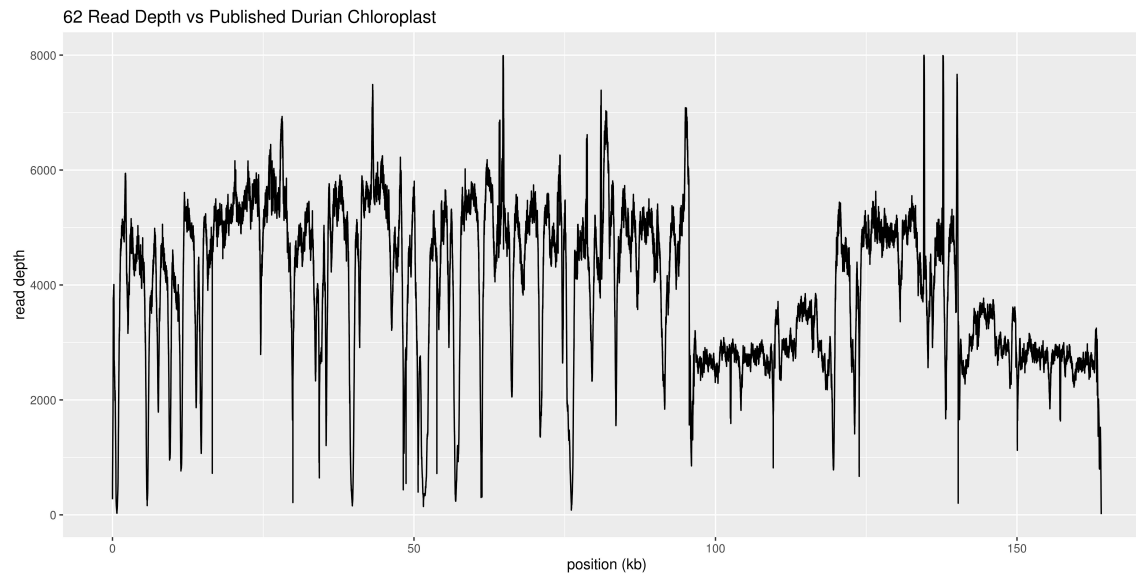

# Supplementary Figure S15: Read depth of durian sample 63 Gratum Thong against our chloroplast and the published chloroplast

63 Read Depth vs Our Durian Chloroplast

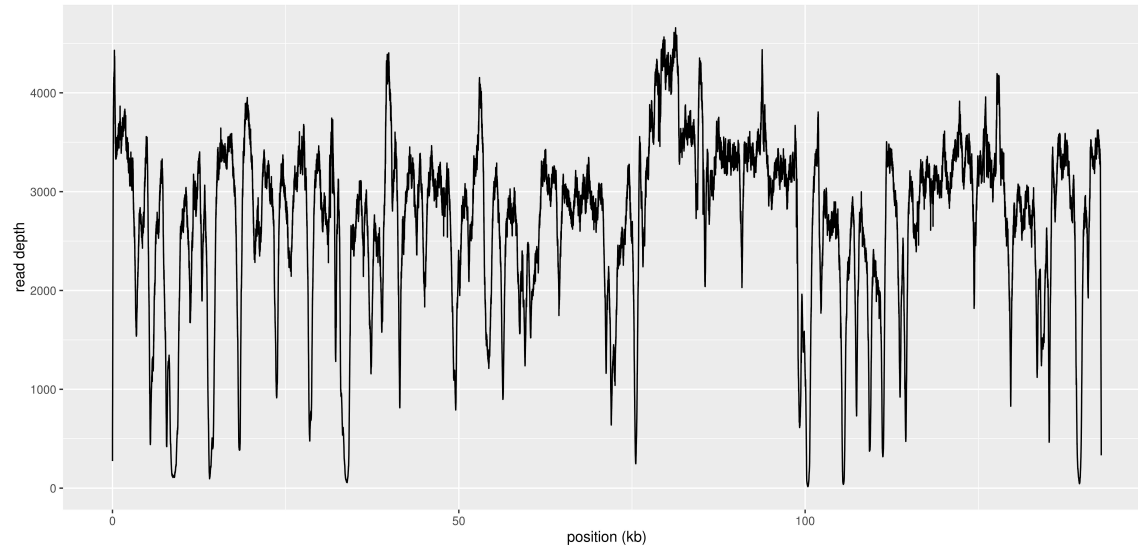

63 Read Depth vs Published Durian Chloroplast

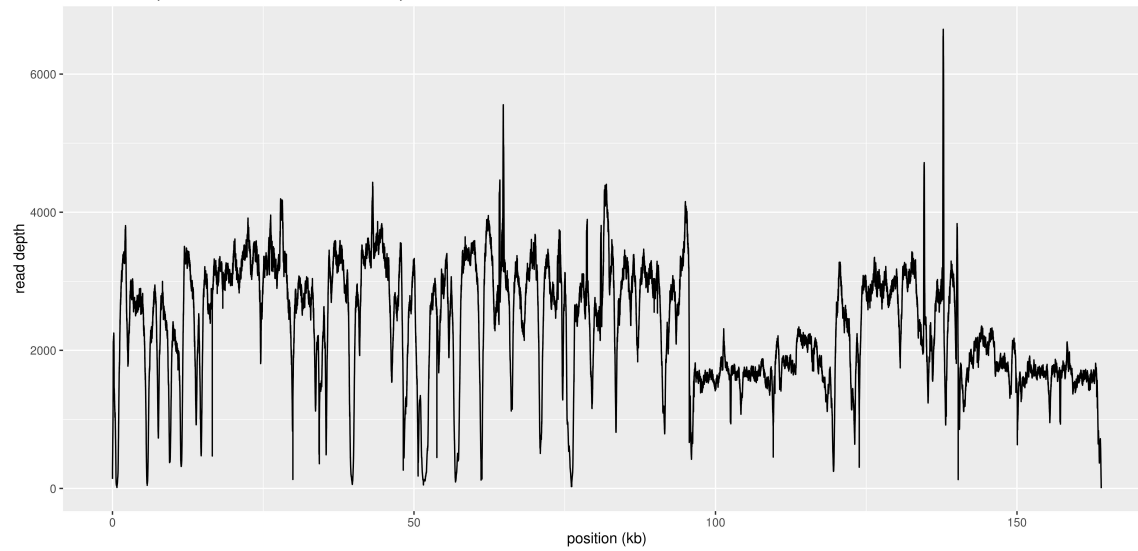

# Supplementary Figure S16: Read depth of durian sample 64 Phuang Mani against our chloroplast and the published chloroplast

64 Read Depth vs Our Durian Chloroplast

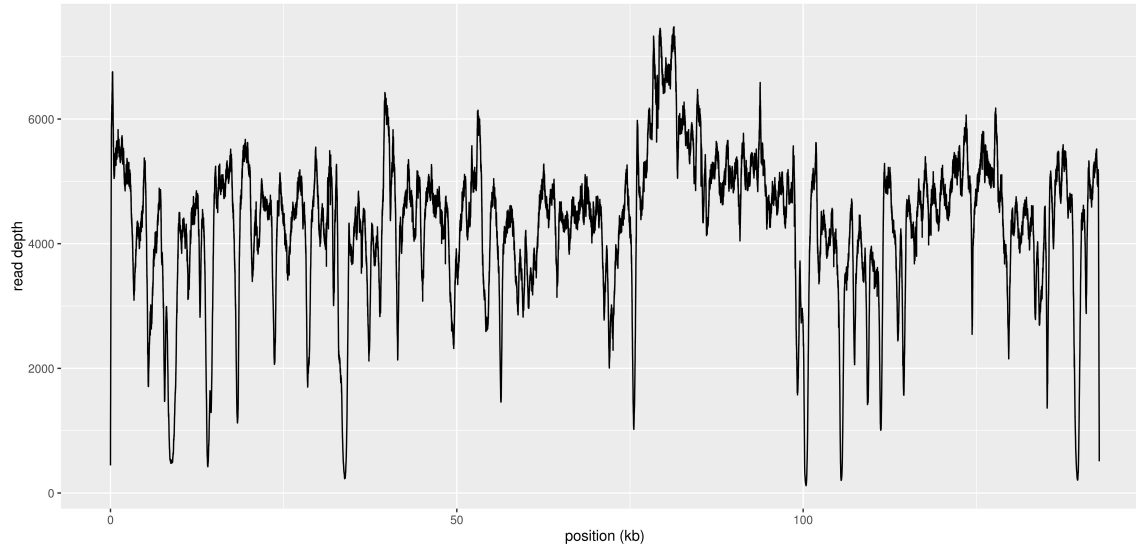

64 Read Depth vs Published Durian Chloroplast

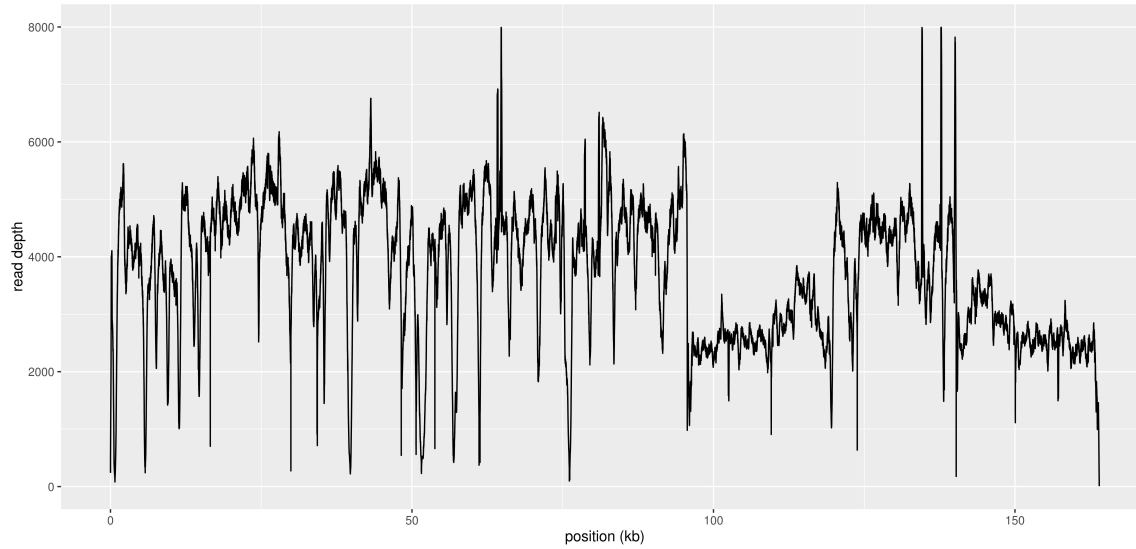

# Supplementary Figure S17: Read depth of durian sample 73 Kop Thakham against our chloroplast and the published chloroplast

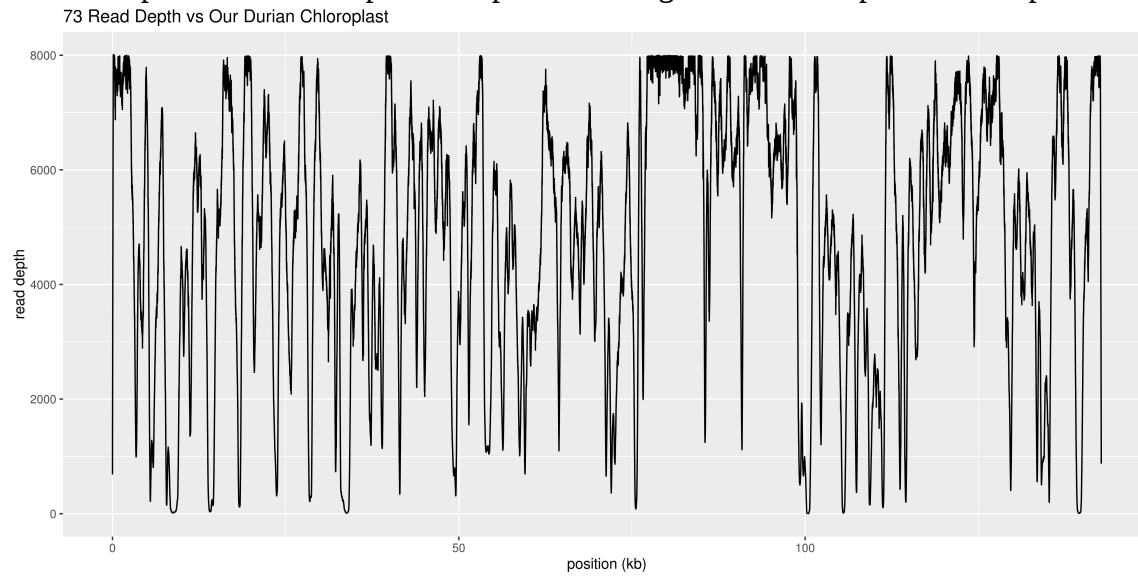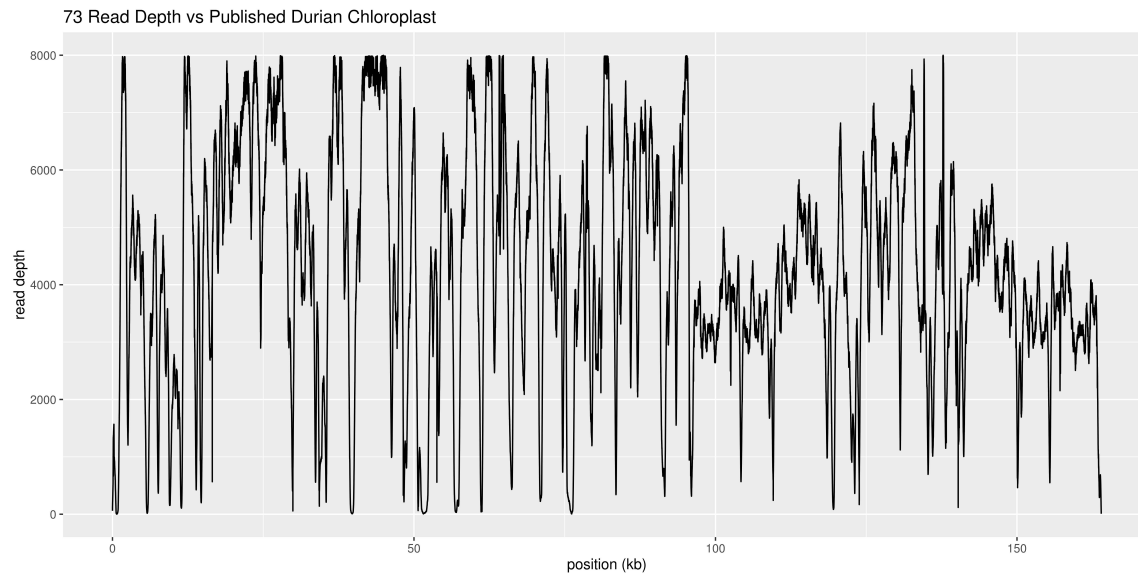

# Supplementary Figure S18: Read depth of durian sample 74 Kop Thatuam against our chloroplast and the published chloroplast

## 74 Read Depth vs Our Durian Chloroplast

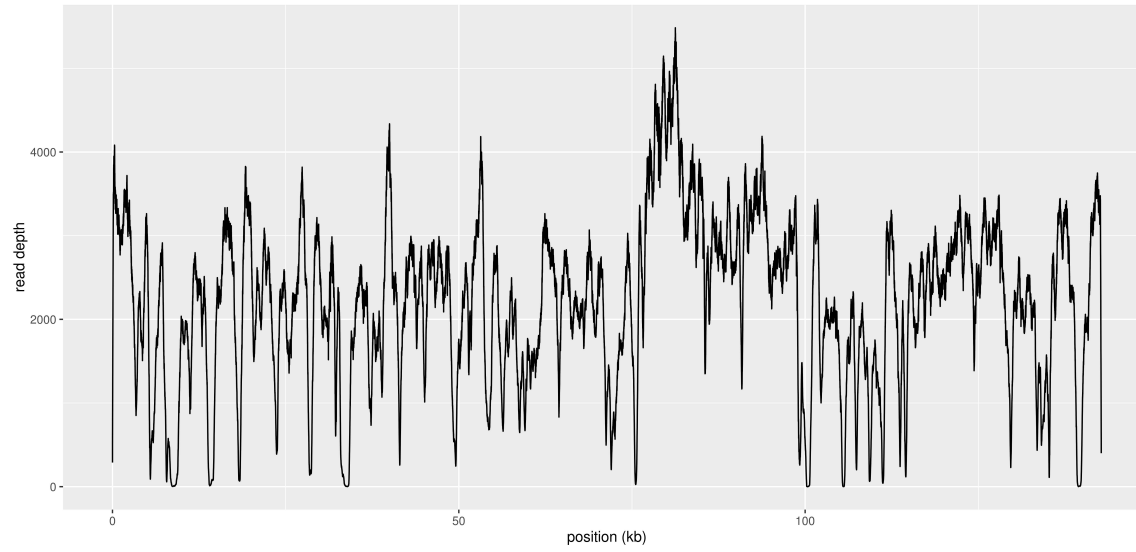

## 74 Read Depth vs Published Durian Chloroplast

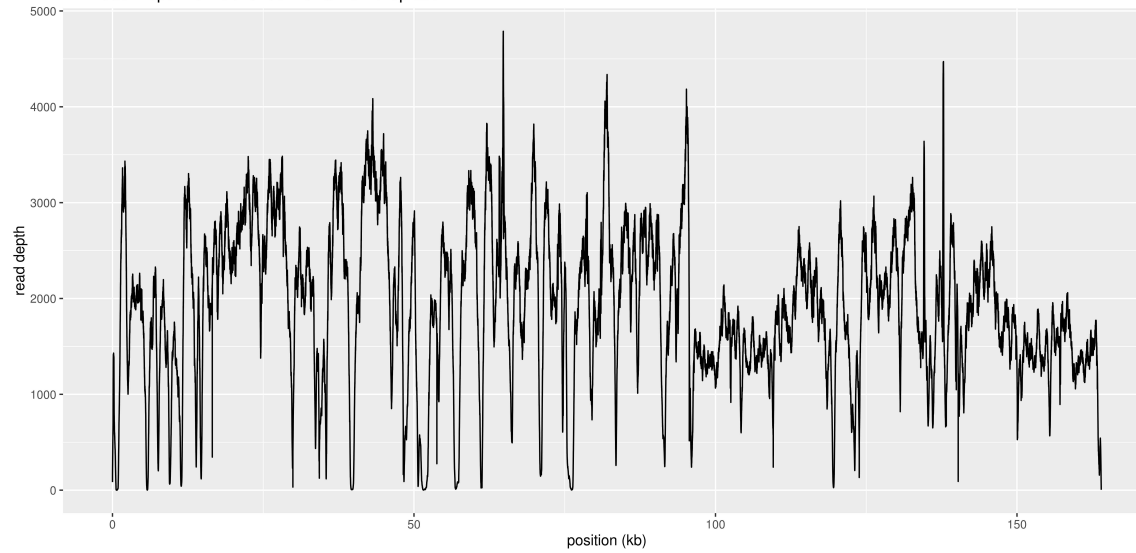

# Supplementary Figure S19: Read depth of durian sample 75 Kop Maethao against our chloroplast and the published chloroplast

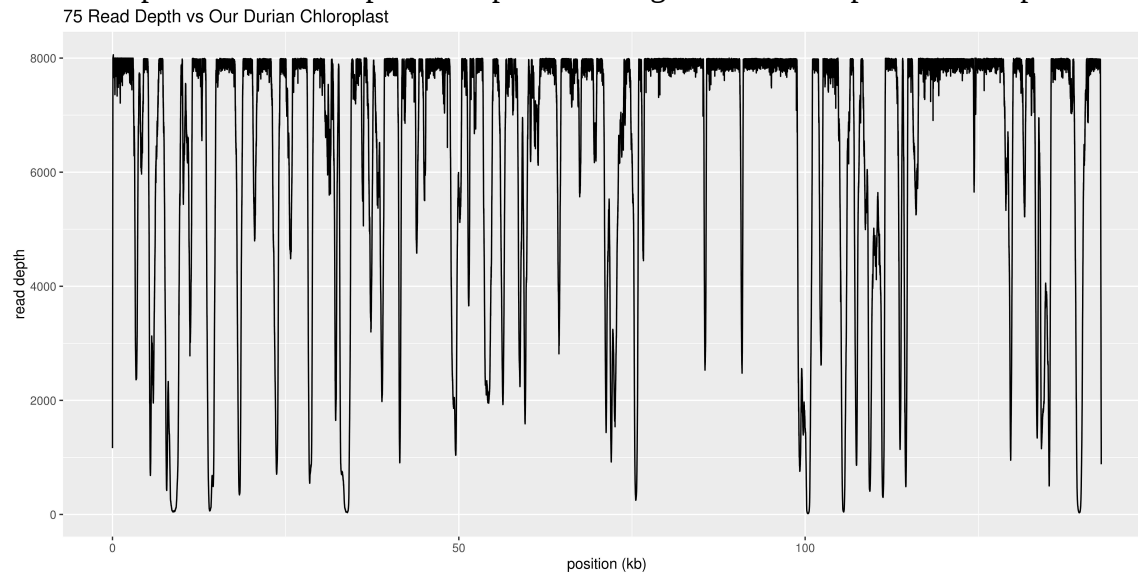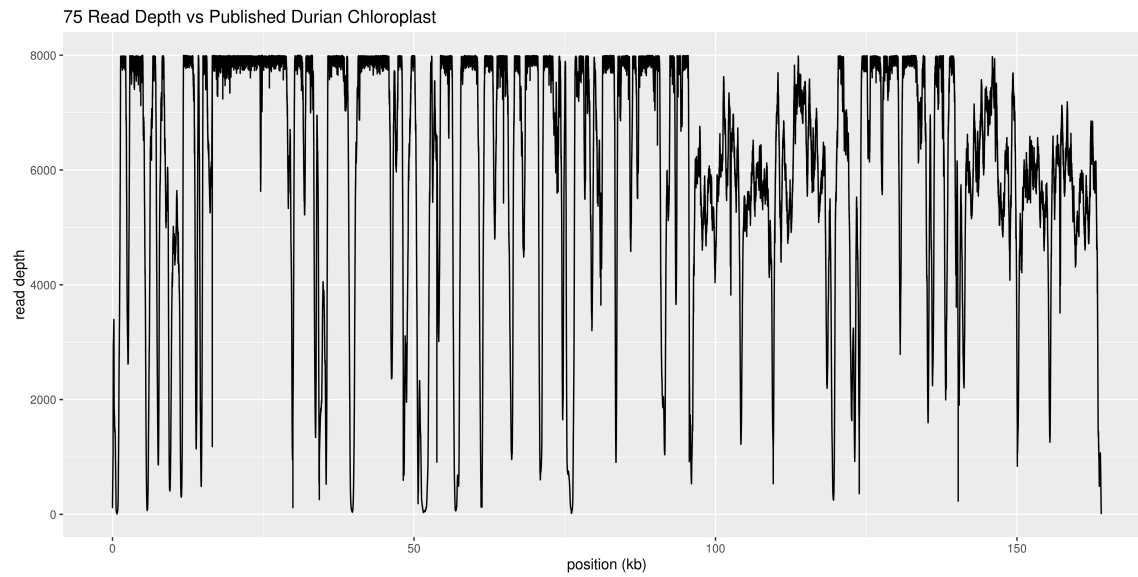



# Supplementary Figure S20: Read depth of durian sample 76 Kop Suwan against our chloroplast and the published chloroplast

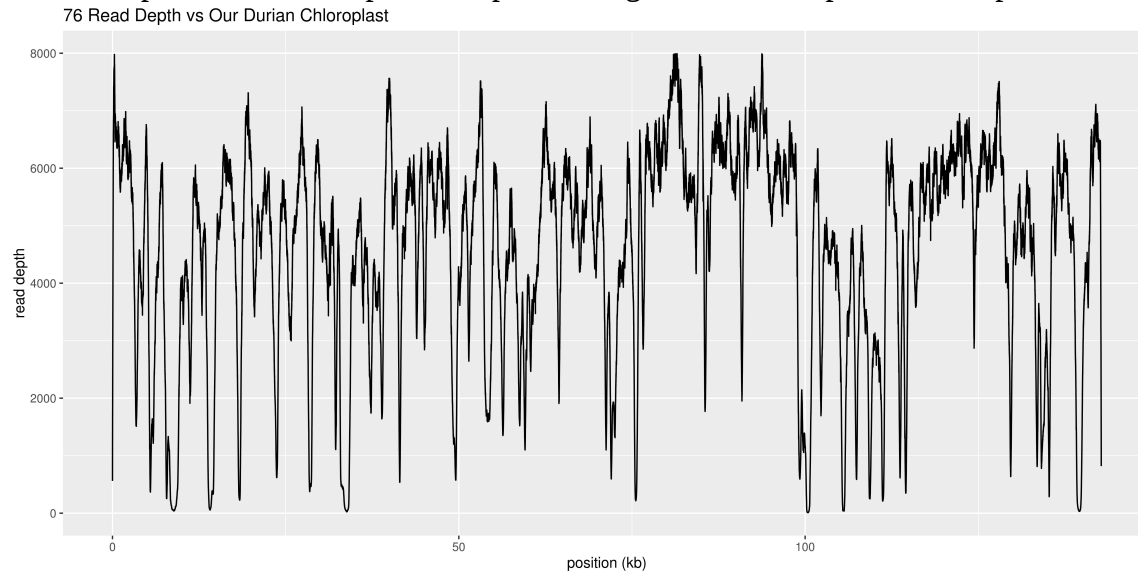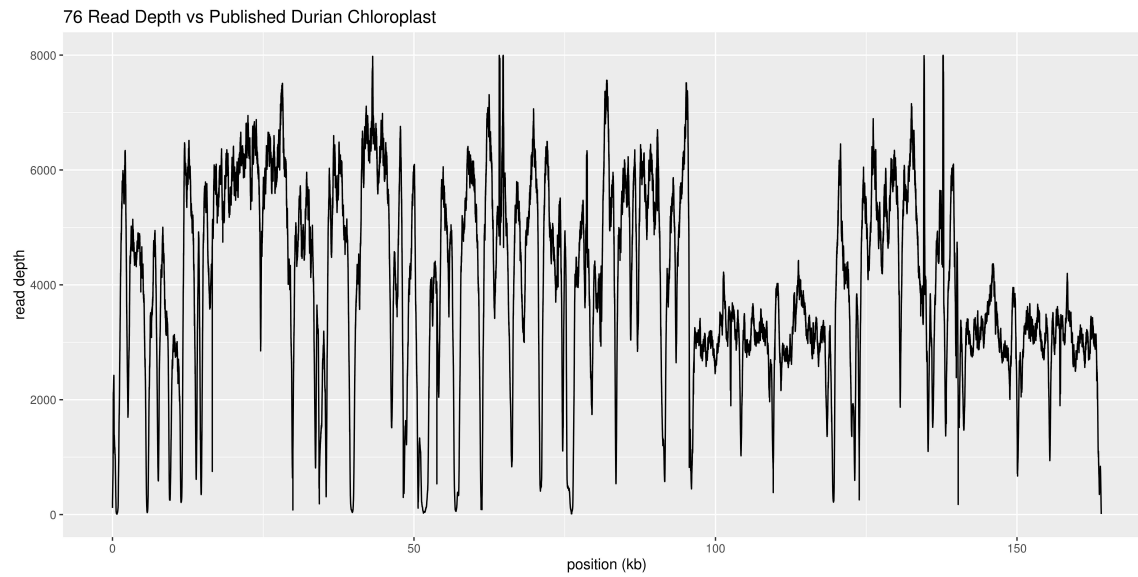

# Supplementary Figure S21: Read depth of durian sample 77 Kop Watkluai against our chloroplast and the published chloroplast

77 Read Depth vs Our Durian Chloroplast

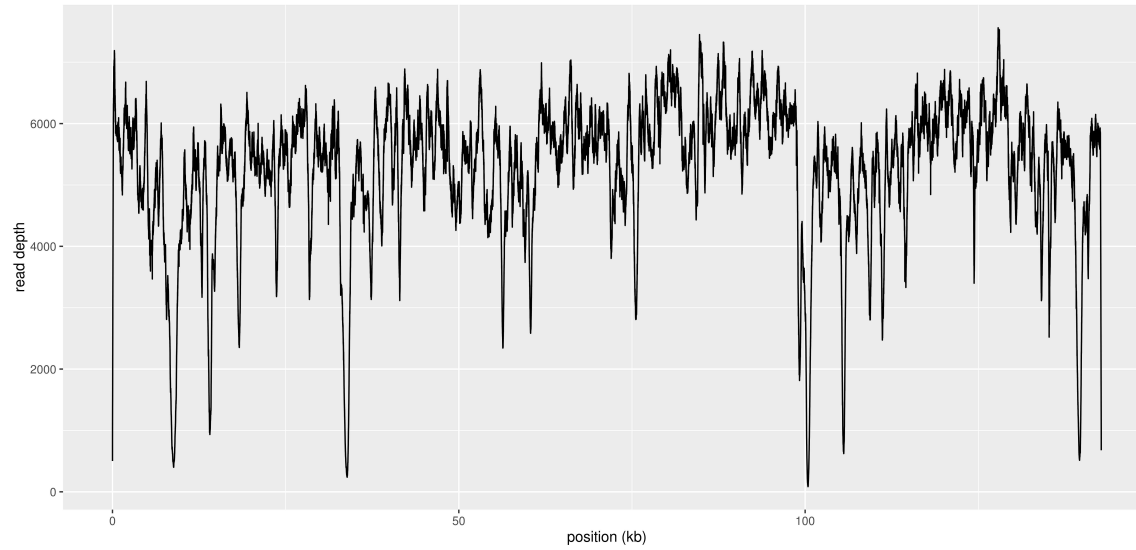

77 Read Depth vs Published Durian Chloroplast

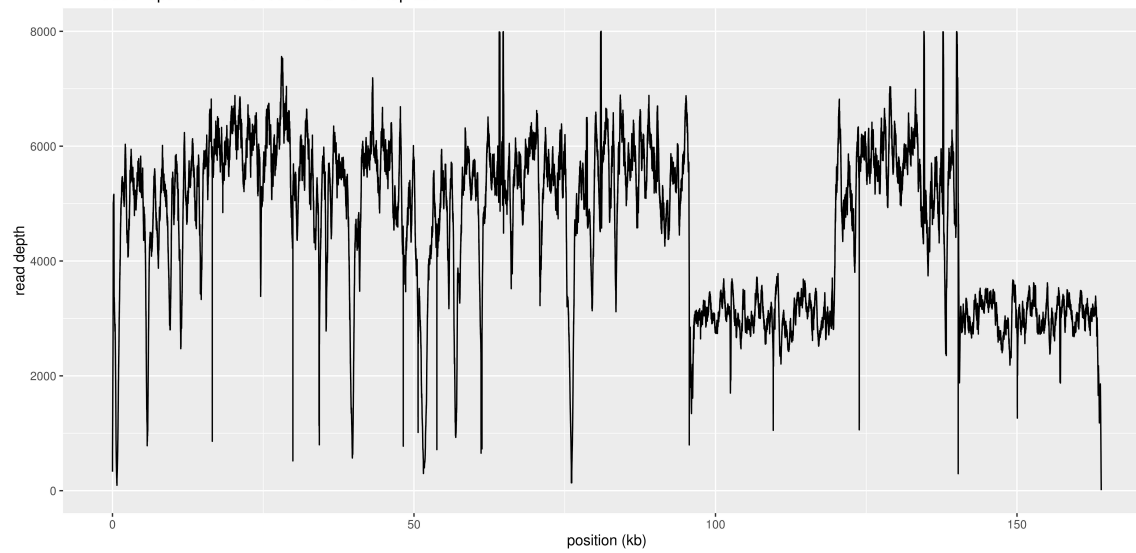

# Supplementary Figure S22: Read depth of durian sample 78 Chompu Si against our chloroplast and the published chloroplast

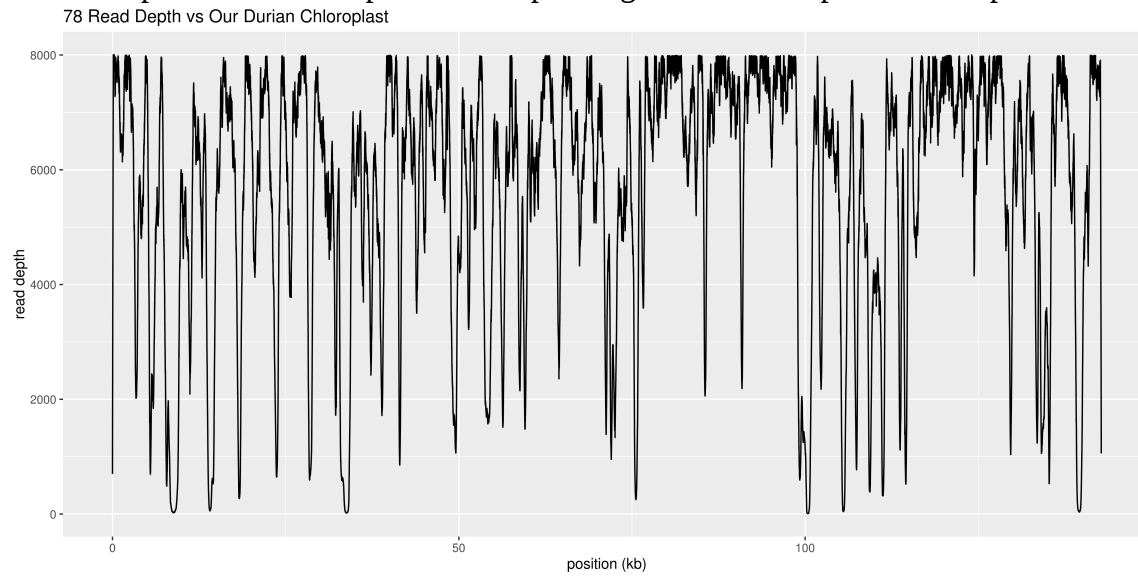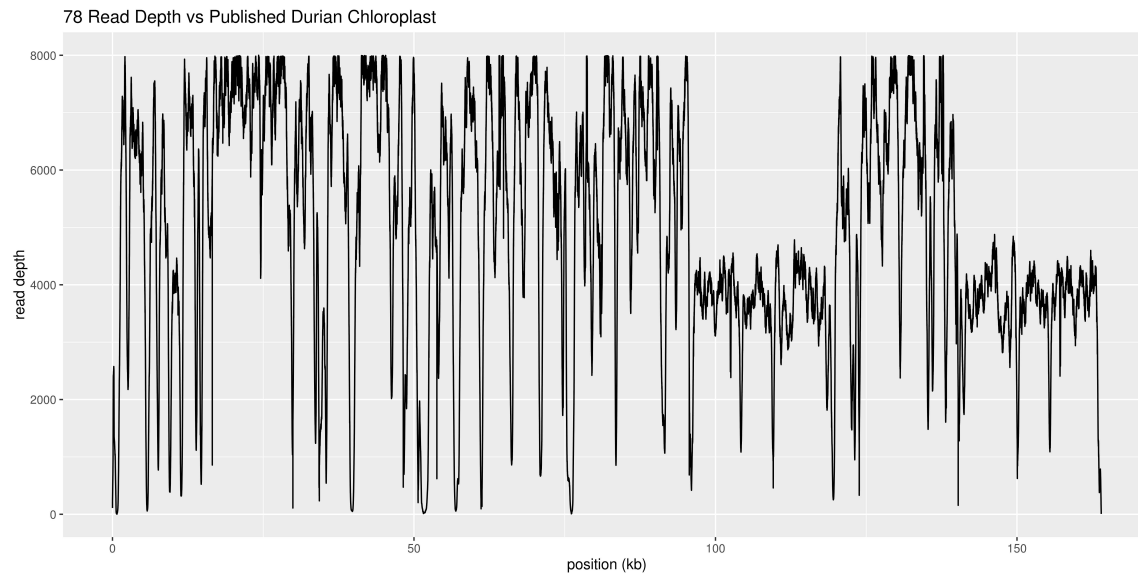

# Supplementary Figure S23: Read depth of durian sample 79 Luang against our chloroplast and the published chloroplast

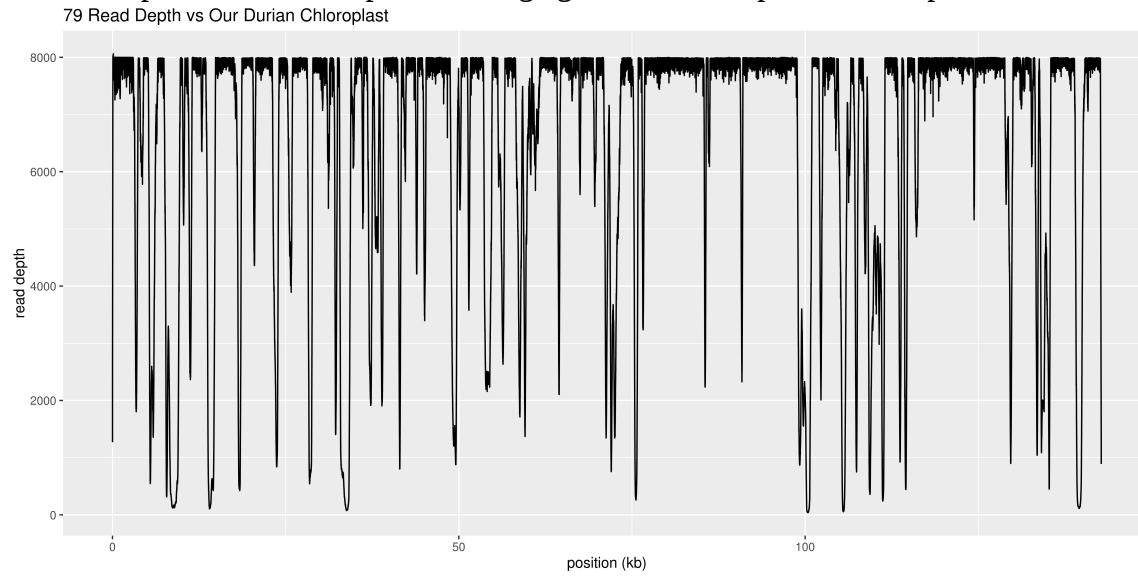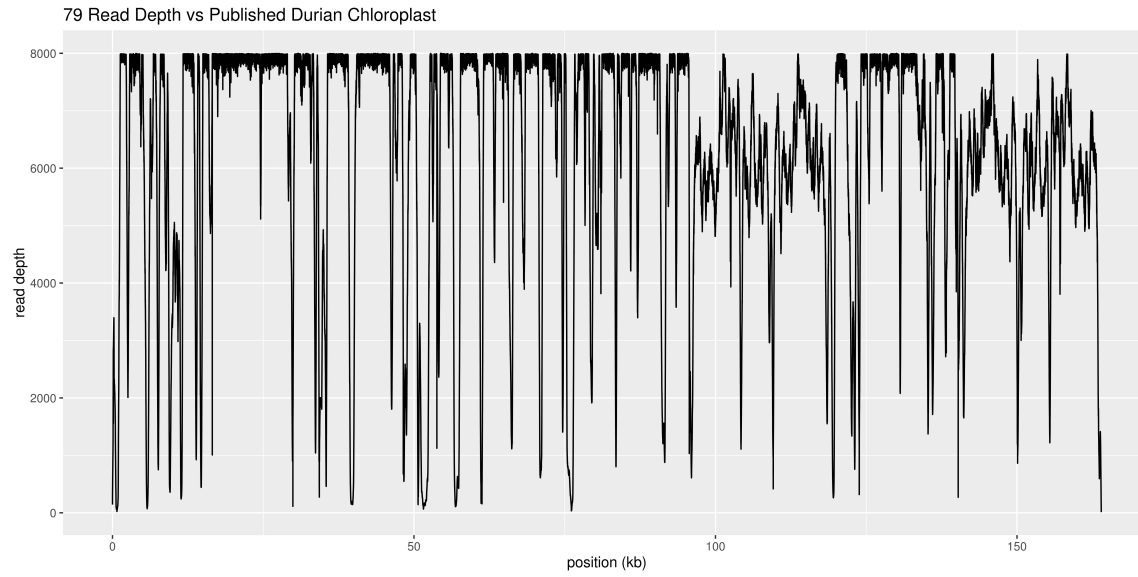

Supplementary Figure S24: Read depth of durian sample 80 Yum Mahaat against our chloroplast and the published chloroplast

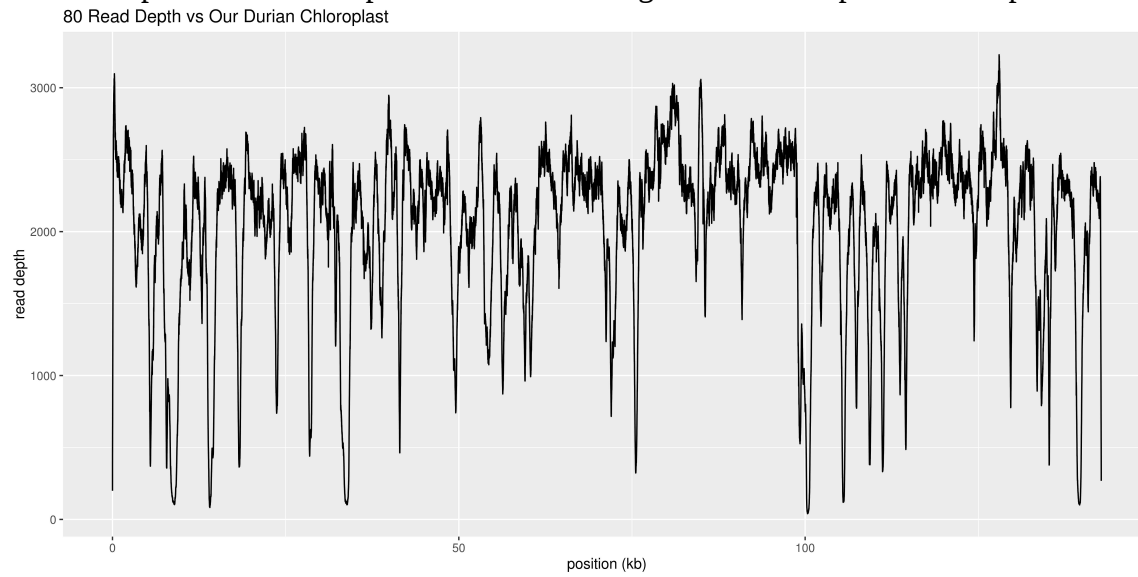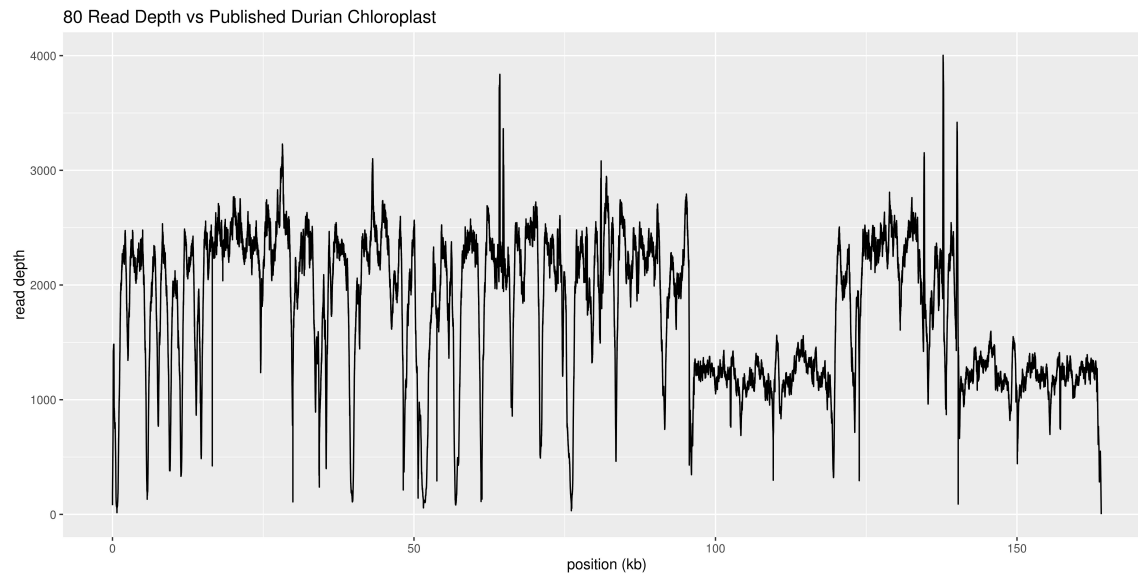

Supplementary Figure S25: Read depth of durian sample Musang King against our chloroplast and the published chloroplast with no reduction to input reads

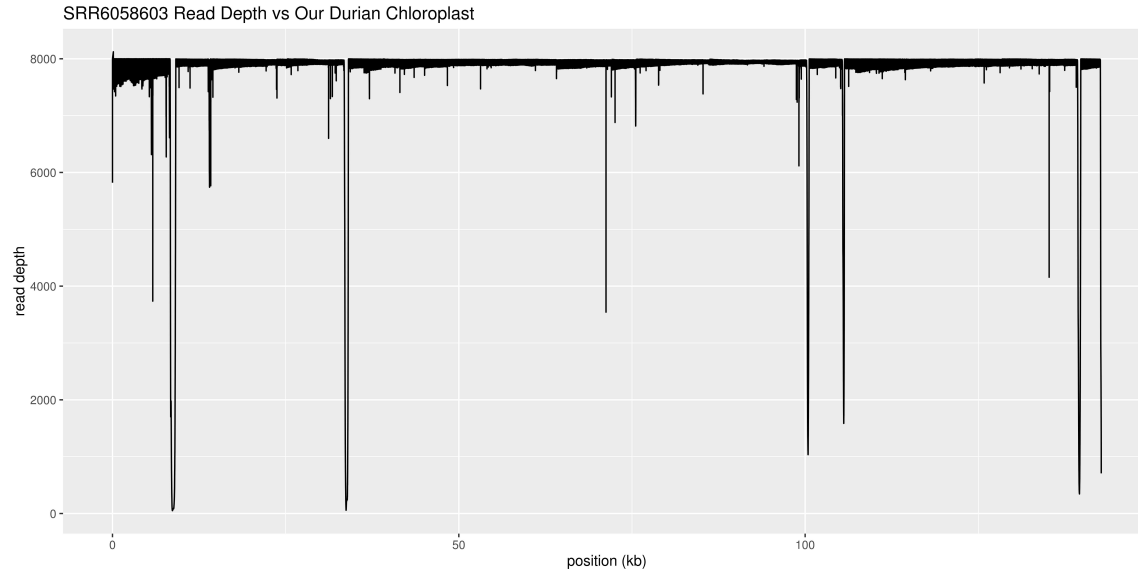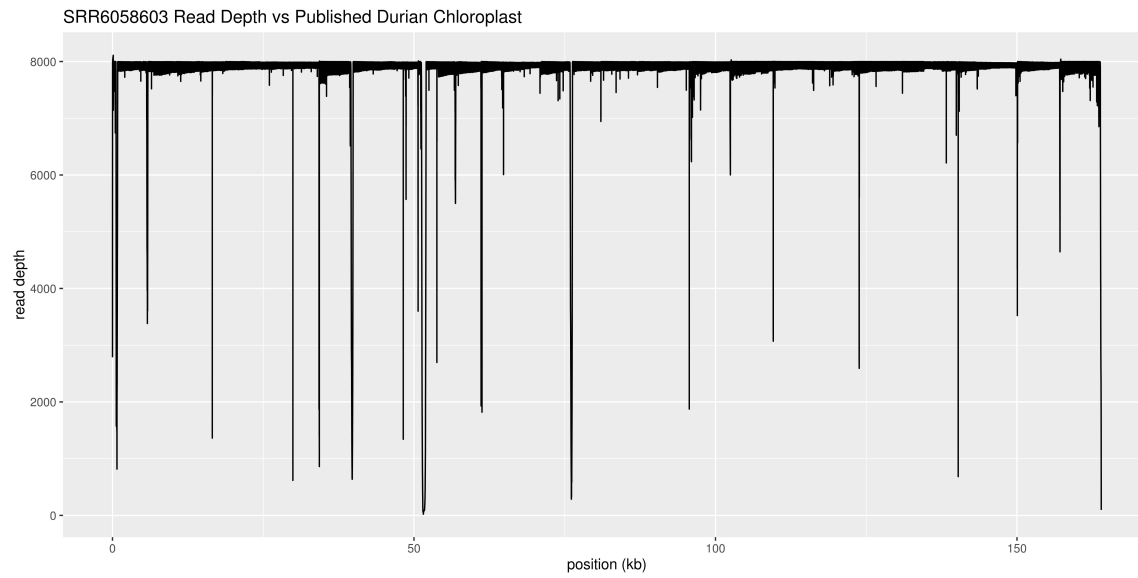

Supplement: 41598_2020_73549_MOESM1_ESM.pdf [file 41598_2020_73549_MOESM1_ESM.pdf]
